1 **Systems genetics analyses in Diversity Outbred mice inform**  
2 **human bone mineral density GWAS and identify *Qsox1* as a**  
3 **novel determinant of bone strength**  
4  
5

6 Basel Al-Barghouthi<sup>1,2,8</sup>, Larry D. Mesner<sup>1,6,8</sup>, Gina M. Calabrese<sup>1,8</sup>, Daniel Brooks<sup>3</sup>,  
7 Steve M. Tommasini<sup>4</sup>, Mary L. Bouxsein<sup>3</sup>, Mark C. Horowitz<sup>4</sup>, Clifford J. Rosen<sup>5</sup>, Kevin  
8 Nguyen<sup>1</sup>, Samuel Haddox<sup>1</sup>, Emily A. Farber<sup>1</sup>, Suna Onengut-Gumuscu<sup>1,6</sup>, Daniel Pomp<sup>7</sup>  
9 and Charles R. Farber<sup>1,2,6</sup>

10  
11 <sup>1</sup> Center for Public Health Genomics, School of Medicine, University of Virginia, Charlottesville, VA 22908

12 <sup>2</sup> Department of Biochemistry and Molecular Genetics, School of Medicine, University of Virginia,  
13 Charlottesville, VA 22908

14 <sup>3</sup> Center for Advanced Orthopedic Studies, Beth Israel Deaconess Medical Center, Department of  
15 Orthopedic Surgery, Harvard Medical School, Boston, MA 02215

16 <sup>4</sup> Department of Orthopaedics and Rehabilitation, Yale School of Medicine, New Haven, CT 06520

17 <sup>5</sup> Maine Medical Center Research Institute, 81 Research Drive, Scarborough, ME 04074

18 <sup>6</sup> Department of Public Health Sciences, School of Medicine, University of Virginia, Charlottesville, VA  
19 22908

20 <sup>7</sup> Department of Genetics, University of North Carolina School of Medicine, Chapel Hill, NC 27599

21 <sup>8</sup> Contributed equally to this work  
22  
23  
24  
25  
26  
27  
28  
29

30 *Correspondence to:*

31  
32 Charles R. Farber

33 E-mail: [crf2s@virginia.edu](mailto:crf2s@virginia.edu)

34 Center for Public Health Genomics

35 University of Virginia

36 P.O. Box 800717

37 Charlottesville, VA 22908, USA

38 Tel. 434-243-8584

39 **ABSTRACT:**

40 Genome-wide association studies (GWASs) for osteoporotic traits have identified over  
41 1000 associations; however, their impact has been limited by the difficulties of causal  
42 gene identification and a strict focus on bone mineral density (BMD). Here, we used  
43 Diversity Outbred (DO) mice to directly address these limitations by performing the first  
44 systems genetics analysis of over 50 complex skeletal phenotypes. We applied a  
45 network approach to cortical bone RNA-seq data to discover 46 genes likely to be  
46 causal for human BMD GWAS associations, including the novel genes *SERTAD4* and  
47 *GLT8D2*. We also performed GWAS in the DO for a wide-range of bone traits and  
48 identified *Qsox1* as a novel gene influencing cortical bone accrual and bone strength.  
49 Our results provide a new perspective on the genetics of osteoporosis and highlight the  
50 ability of the mouse to inform human genetics.

51

52 **INTRODUCTION:**

53 Osteoporosis is a condition of low bone strength and an increased risk of fracture <sup>1</sup>. It is  
54 also one of the most prevalent diseases in the U.S., affecting over 12 million individuals  
55 <sup>2</sup>. Over the last decade, efforts to dissect the genetic basis of osteoporosis using  
56 genome-wide association studies (GWASs) have been tremendously successful,  
57 identifying over 1000 independent associations <sup>3-5</sup>. These data have the potential to  
58 revolutionize our understanding of bone biology and discovery of novel therapeutic  
59 targets <sup>6,7</sup>; however, progress to date has been limited.

60

61 One of the main limitations of human GWAS is the difficulty identifying causal genes.  
62 This is largely due to the fact that most associations implicate non-coding variation  
63 presumably influencing BMD by altering gene regulation <sup>5</sup>. For other diseases, the use  
64 of molecular “-omics” data (e.g., transcriptomic, epigenomic, etc.) in conjunction with  
65 systems genetics approaches (e.g., identification of expression quantitative trait loci  
66 (eQTL) and network-based approaches) has successfully informed gene discovery <sup>8,9</sup>.  
67 However, few “-omics” datasets exist on bone or bone cells in large human cohorts (e.g,  
68 bone or bone cells were not part of the Gene Tissue Expression (GTEx) project <sup>10</sup>),  
69 limiting the use of systems genetics approaches to inform BMD GWAS <sup>11</sup>.

70

71 A second limitation is that all large-scale GWASs have focused exclusively on bone  
72 mineral density (BMD) <sup>3-5</sup>. BMD is a clinically relevant predictor of osteoporotic fracture;  
73 however, it explains only part of the variance in bone strength <sup>12-15</sup>. Imaging modalities  
74 and bone biopsies can be used to collect data on other bone traits such as trabecular

75 microarchitecture and bone formation rates; however, it will be difficult to apply these  
76 techniques “at scale” (N=>100K). Additionally, many aspects of bone, including  
77 biomechanical properties, cannot be measured *in vivo*. These limitations have  
78 hampered the dissection of the genetics of osteoporosis and highlight the need for  
79 resources and approaches that address the challenges faced by human studies.

80

81 The Diversity Outbred (DO) is a highly engineered mouse population derived from eight  
82 genetically diverse inbred founders<sup>16</sup>. The DO has been randomly mated for over 30  
83 generations and, as a result, it enables high-resolution genetic mapping and relatively  
84 efficient identification of causal genes<sup>17,18</sup>. As an outbred stock, the DO also more  
85 closely approximates the highly heterozygous genomes of a human population. These  
86 attributes, coupled with the ability to perform detailed and in-depth characterization of  
87 bone traits and generate molecular data on bone, position the DO as a platform to  
88 assist in addressing the limitations of human studies described above.

89

90 Here, we created a resource for the systems genetics of bone strength consisting of  
91 information on over 50 bone traits and RNA-seq data from marrow-depleted cortical  
92 bone in over 600 DO mice. We demonstrated the utility of this resource in two ways.  
93 First, we applied a network approach to the bone transcriptomics data and identified 46  
94 bone-associated nodes, whose human homologs are located in BMD GWAS loci and  
95 are regulated by colocalizing eQTL. Of the 46, nine were not previously known to  
96 influence BMD. Further investigation of two of the nine novel genes, *SERTAD4* and  
97 *GLT8D2*, supported them as causal and suggested they influenced BMD via a role in

98 osteoblasts. Second, we performed GWASs for over 50 complex traits associated with  
99 bone strength; identifying 28 QTL. By integrating QTL and bone eQTL data, we  
100 identified *Qsox1* as the gene responsible for a QTL on Chromosome (Chr.) 1 influencing  
101 cortical bone accrual along the medial-lateral femoral axis and femoral strength. These  
102 data highlight the power of the DO mouse resource to complement and inform human  
103 genetic studies of osteoporosis.

104

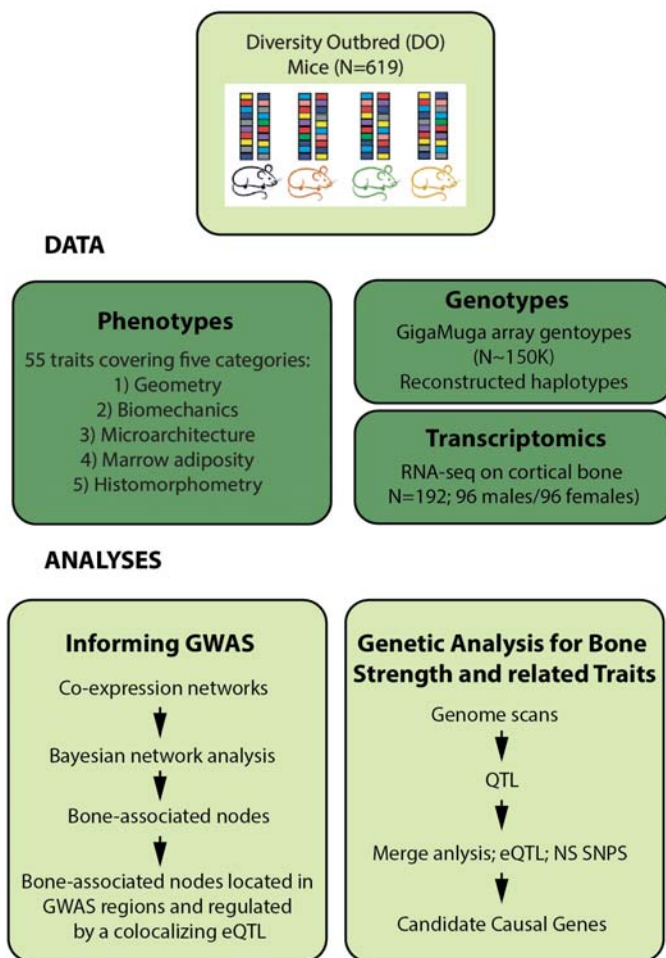

**Figure 1. Resource overview.** An overview of the resource including data generated and analyses.

## RESULTS:

### Development of a resource for the systems genetics of bone strength:

An overview of the resource is presented in **Figure 1**. We measured 55 complex skeletal phenotypes in a cohort of DO mice (N=619; 314 males, 305 females; breeding generations 23-33) at 12 weeks of age. We also generated RNA-seq data from marrow-depleted femoral diaphyseal bone (N=192;

120 using the GigaMUGA<sup>19</sup> array

121 (~150K SNPs) and these data were used to reconstruct genome-wide haplotype

122 structures of each mouse. As expected, the genomes of DO mice consisted of  
123 approximately 12.5% from each of the eight DO founders (**Supplemental Figure 1A**).  
124  
125 The collection of phenotypes included measures of geometry, microarchitecture, and  
126 biomechanics of the femur, along with tibial histomorphometry and marrow adiposity  
127 (**Supplemental Table 1**). Our data included quantification of femoral strength as well as  
128 many clinically relevant predictors of strength and fracture risk (*e.g.*, trabecular and  
129 cortical microarchitecture). Traits in all categories (except tibial marrow adipose tissue  
130 (MAT)) were significantly ( $P_{\text{adj}} < 0.05$ ) correlated with femoral strength (**Supplemental**  
131 **Table 2**). Additionally, all traits exhibited substantial variation across the DO cohort. For  
132 example, we observed a 30.8-fold variation in trabecular bone volume fraction (BV/TV)  
133 of the distal femur and 5.6-fold variation in femoral strength (**Supplemental Figure 1B**).  
134 After adjusting for covariates (age, generation, sex, and body weight) all traits had non-  
135 zero heritabilities ( $h^2$ ) (**Supplemental Figure 1C**). Correlations between traits in the DO  
136 were consistent with expected relationships observed in previous mouse and human  
137 studies (**Supplemental Table 3**)<sup>20–23</sup>.

138

### 139 **Identification of bone-associated nodes:**

140 Here, we demonstrate how bone transcriptomic data in the DO can be used to inform  
141 human GWAS. First, we partitioned genes into groups based on co-expression by  
142 applying Weighted Gene Co-Expression (WGCNA) network analysis to cortical bone  
143 RNA-seq data<sup>24</sup>. We generated three WGCNA networks; a sex-combined network as  
144 well as sex-specific networks. The three networks contained a total of 124 modules

145 **(Supplemental Table 4)**. A Gene Ontology (GO) analysis revealed that nearly all  
146 modules were enriched for genes involved in specific biological processes, including  
147 modules enriched for processes specific to bone cells (osteoblasts or osteoclasts)  
148 **(Supplemental Table 5)**.

149  
150 We next generated Bayesian networks for each co-expression module, allowing us to  
151 model directed gene-gene relationships based on conditional independence. Across the  
152 three network sets, we found that genes known to influence bone traits (“known bone  
153 gene” list (N=1,539); **Supplemental Table 6**); see methods) were more highly  
154 connected than all other genes ( $P=2.6 \times 10^{-5}$ ,  $P=5.2 \times 10^{-3}$ , and  $P=5.5 \times 10^{-7}$  for  
155 combined, male, and female network sets, respectively), indicating the structure of the  
156 Bayesian networks was not random with respect to connectivity.

157  
158 To discover genes potentially responsible for GWAS associations, we identified bone-  
159 associated nodes (BANs). BANs were defined as genes connected in Bayesian  
160 networks with more genes in the “known bone” list than would be expected by chance  
161 <sup>25–28</sup>. The analysis identified 1,050 genes with evidence ( $P<0.05$ ) of being a BAN (*i.e.*,  
162 sharing network connections with genes known to participate in a bone “regulatory”  
163 process) (**Supplemental Table 7**).

164  
165 **Using BANs to inform human BMD GWAS:**

166 We reasoned that the BAN list was enriched for causal BMD GWAS genes. To identify  
167 casual BANs, we used data from BMD GWAS and human eQTL data. Of the 1,050  
168 BANs, 900 had human homologs and 544 of those were within 1 Mbp of one of the

169 1103 BMD GWAS lead SNPs identified in <sup>5</sup>. For each human homolog, we identified  
170 local eQTL in non-bone samples using the Gene Tissue Expression (GTEx) project  
171 <sup>10,29,30</sup>. We then tested each eQTL for colocalization with their respective BMD GWAS  
172 association <sup>3,5</sup>. Of the 544 BANs located in proximity of BMD GWAS loci, 46 had  
173 colocalizing eQTL (PPH4>0.75) in at least one GTEx tissue (**Table 1**). Of these, 37  
174 (80.4%) were known regulators of bone biology (based on comparing to the known  
175 bone list (N=29) and a literature search for genes influencing bone cell function (N=8)),  
176 highlighting the ability of the approach to recover known biology. Based on overlap with  
177 the known bone list this represents a highly significant enrichment (OR=7.7, P=5.5 x 10<sup>-</sup>  
178 <sup>14</sup>). Our approach identified genes such as *SP7* (Osterix) <sup>31</sup>, *SOST* <sup>32,33</sup>, and *LRP5* <sup>34-36</sup>,  
179 which play central roles in osteoblast-mediated bone formation. Genes essential to  
180 osteoclast activity, such as *TNFSF11* (RANKL) <sup>37-40</sup>, *TNFRSF11A* (RANK) <sup>41,42</sup>, and  
181 *SLC4A2* <sup>43</sup> were also identified. Nine (19.6%) genes were not previously implicated in  
182 the regulation of bone traits.

183

184 One of the advantages of the network approach is the ability to identify potentially  
185 causal genes and provide insight into how they impact BMD based on their module  
186 membership and network connections. For example, the “cyan” module in the female  
187 network (cyan\_F) harbored many of the known BANs that influence BMD through a role  
188 in osteoclasts (the GO term “osteoclast differentiation” was highly enriched P=2.8 x 10<sup>-</sup>  
189 <sup>15</sup> in the cyan\_F module) (**Supplemental Table 5**). Two of the nine novel BANs with  
190 colocalizing eQTL (**Table 1**), *ATP6V1A* and *PRKCH*, were members of the cyan module  
191 in the female network. Based on their cyan module membership it is likely they play a



192 role in osteoclasts. *ATP6V1A* is a subunit of the vacuolar ATPase V1 domain<sup>44</sup>. The  
 193 vacuolar ATPase plays a central role in the ability of osteoclasts to acidify matrix and  
 194 resorb bone, though *ATP6V1A* itself has not been directly connected to the regulation of  
 195 BMD<sup>44</sup>. *PRCKH* encodes the eta isoform of protein kinase C and is highly expressed in  
 196 osteoclasts<sup>45</sup>.

197

198 **Table 1. Homologous human BANs with colocalizing eQTL**

| Gene     | WGCNA module  | PPH4 | # neighbors | # bone neighbors | BAN P-value          |
|----------|---------------|------|-------------|------------------|----------------------|
| ADAM12   | Brown_F       | 0.90 | 13          | 5                | 4.0x10 <sup>-3</sup> |
| ARHGAP1  | Blue_M        | 0.99 | 8           | 3                | 3.2x10 <sup>-2</sup> |
| ATP6V1A  | Cyan_C        | 0.87 | 33          | 12               | 1.5x10 <sup>-5</sup> |
| B4GALNT3 | Brown_F       | 0.99 | 7           | 3                | 1.9x10 <sup>-2</sup> |
| BICC1    | Brown_C       | 0.76 | 16          | 4                | 4.8x10 <sup>-2</sup> |
| BMP8A    | Yellow_M      | 0.82 | 12          | 5                | 3.2x10 <sup>-3</sup> |
| CCR1     | Cyan_C        | 0.99 | 50          | 11               | 4.0x10 <sup>-3</sup> |
| CD109    | Brown_C       | 0.82 | 22          | 6                | 1.1x10 <sup>-2</sup> |
| CKB      | Cyan_C        | 0.96 | 18          | 9                | 8.0x10 <sup>-6</sup> |
| DOCK9    | Red_F         | 0.98 | 9           | 5                | 5.5x10 <sup>-4</sup> |
| FAM3C    | Brown_C       | 0.84 | 30          | 6                | 4.6x10 <sup>-2</sup> |
| FAT1     | Yellow_M      | 0.97 | 8           | 3                | 3.2x10 <sup>-2</sup> |
| FGFRL1   | Turquoise_F   | 0.99 | 11          | 4                | 1.3x10 <sup>-2</sup> |
| FRZB     | Brown_F       | 0.99 | 7           | 3                | 1.9x10 <sup>-2</sup> |
| GBA      | Cyan_F        | 0.94 | 17          | 5                | 1.5x10 <sup>-2</sup> |
| GJA1     | Brown_C       | 0.89 | 11          | 4                | 1.2x10 <sup>-2</sup> |
| GLT8D2   | Royalblue_M   | 0.88 | 21          | 5                | 4.1x10 <sup>-2</sup> |
| GREM2    | Greenyellow_F | 0.99 | 10          | 4                | 8.9x10 <sup>-3</sup> |
| IHH      | Red_C         | 0.89 | 7           | 3                | 1.9x10 <sup>-2</sup> |
| LRP4     | Brown_C       | 0.96 | 13          | 4                | 2.3x10 <sup>-2</sup> |
| LRP5     | Yellow_M      | 0.84 | 5           | 3                | 7.1x10 <sup>-3</sup> |
| MDK      | Brown_C       | 0.97 | 9           | 3                | 4.0x10 <sup>-2</sup> |
| MEPE     | Red_F         | 0.8  | 20          | 7                | 1.3x10 <sup>-3</sup> |
| MMP14    | Brown_C       | 0.83 | 27          | 10               | 6.3x10 <sup>-5</sup> |
| MPRIP    | Yellow_M      | 0.75 | 15          | 5                | 9.6x10 <sup>-3</sup> |
| MRC2     | Brown_F       | 0.99 | 3           | 2                | 2.3x10 <sup>-2</sup> |

|                  |                |      |    |   |                      |
|------------------|----------------|------|----|---|----------------------|
| NEK6             | Yellow_M       | 0.97 | 4  | 2 | $4.6 \times 10^{-2}$ |
| <b>NPR2</b>      | Turquoise_M    | 0.86 | 8  | 3 | $3.2 \times 10^{-2}$ |
| <b>PKD1</b>      | Midnightblue_M | 0.86 | 13 | 4 | $2.7 \times 10^{-2}$ |
| <b>PKDCC</b>     | Turquoise_C    | 0.93 | 15 | 4 | $3.9 \times 10^{-2}$ |
| PRKCH            | Cyan_C         | 0.78 | 33 | 9 | $1.9 \times 10^{-3}$ |
| <b>PSTPIP1</b>   | Yellow_C       | 0.88 | 41 | 8 | $2.6 \times 10^{-2}$ |
| <b>RASD1</b>     | Tan_C          | 0.88 | 38 | 8 | $1.7 \times 10^{-2}$ |
| SERTAD4          | Royalblue_M    | 0.77 | 13 | 6 | $6.4 \times 10^{-4}$ |
| SH3RF3           | Greenyellow_F  | 0.99 | 15 | 4 | $4.0 \times 10^{-2}$ |
| <b>SLC4A2</b>    | Cyan_F         | 0.98 | 19 | 7 | $9.2 \times 10^{-4}$ |
| <b>SLC7A7</b>    | Green_M        | 0.86 | 3  | 2 | $2.5 \times 10^{-2}$ |
| <b>SMAD9</b>     | Red_C          | 0.92 | 22 | 7 | $2.3 \times 10^{-3}$ |
| <b>SOCS2</b>     | Brown_F        | 0.94 | 6  | 3 | $1.2 \times 10^{-2}$ |
| <b>SOST</b>      | Red_C          | 0.95 | 24 | 8 | $7.8 \times 10^{-4}$ |
| <b>SP7</b>       | Brown_C        | 0.99 | 13 | 4 | $2.3 \times 10^{-2}$ |
| <b>SPP1</b>      | Cyan_C         | 0.99 | 29 | 7 | $1.2 \times 10^{-2}$ |
| <b>THBS3</b>     | Darkorange_C   | 0.98 | 22 | 5 | $4.1 \times 10^{-2}$ |
| <b>TNFRSF11A</b> | Cyan_F         | 0.76 | 9  | 3 | $7.9 \times 10^{-6}$ |
| <b>TNFSF11</b>   | Lightcyan_F    | 0.76 | 9  | 4 | $5.8 \times 10^{-3}$ |
| UBE2R2           | Red_M          | 0.93 | 15 | 4 | $4.5 \times 10^{-2}$ |

199

200 Next, we focused on two of the novel BANs with colocalizing eQTL, *SERTAD4* (GTEx  
201 Subcutaneous Adipose; coloc PPH4=0.77; PPH4/PPH3=7.9) and *GLT8D2* (GTEx  
202 Pituitary; coloc PPH4=0.87; PPH4/PPH3=13.4). Both genes were members of the  
203 royalblue module in the male network (royalblue\_M). The function of *SERTAD4* (SERTA  
204 domain-containing protein 4) is unclear, though proteins with SERTA domains have  
205 been linked to cell cycle progression and chromatin remodeling<sup>46</sup>. *GLT8D2*  
206 (glycosyltransferase 8 domain containing 2) is a glycosyltransferase linked to  
207 nonalcoholic fatty liver disease<sup>47</sup>. The eigengene of royalblue\_M module was  
208 significantly correlated with several traits, including trabecular number (Tb.N; rho=-0.26;  
209  $P=9.5 \times 10^{-3}$ ) and separation (Tb.Sp; rho=0.27;  $P=7.1 \times 10^{-3}$ ), among others

210 **(Supplemental Table 8)**. The royalblue\_M module was enriched for genes involved in  
211 processes relevant to osteoblasts such as “extracellular matrix” ( $P=8.4 \times 10^{-19}$ ),  
212 “endochondral bone growth” ( $P=5.7 \times 10^{-4}$ ), “ossification” ( $P=8.9 \times 10^{-4}$ ) and “negative  
213 regulation of osteoblast regulation” ( $P=0.04$ ) (**Supplementary Table 5**). Additionally,  
214 *Sertad4* and *Glt8d2* were connected, in their local (3-step) Bayesian networks, to well-  
215 known regulators of osteoblast/osteocyte biology (such as *Wnt16*<sup>48</sup>, *Postn*<sup>49,50</sup>, and  
216 *Col12a1*<sup>51</sup> for *Sertad4* and *Pappa2*<sup>52</sup>, *Pax1*<sup>52,53</sup>, and *Tnn*<sup>54</sup> for *Glt8d2*) (**Figure 2A and**  
217 **2B**). *Sertad4* and *Glt8d2* were strongly expressed in calvarial osteoblasts with  
218 expression increasing ( $P<2.2 \times 10^{-16}$  and  $P=6.4 \times 10^{-10}$ , respectively) throughout the  
219 course of differentiation (**Figure 2C**). To further investigate their expression in  
220 osteoblasts, we generated single-cell RNA-seq (scRNA-seq) data on mouse bone  
221 marrow-derived stromal cells. Clusters of cell-types were grouped into mesenchymal  
222 progenitors, preadipocytes/adipocytes, osteoblasts, osteocytes, and non-osteogenic  
223 cells based on the expression of genes defining each cell-type. *Sertad4* was expressed  
224 across multiple cell-types, with its highest expression in a specific cluster (cluster 9) of  
225 mesenchymal progenitor cells and lower levels of expression in osteocytes (cluster 10)  
226 (**Figure 2D**). *Glt8d2* was expressed in a relatively small number of cells in both  
227 progenitor and mature osteoblast populations (**Figure 2D**).

228 Finally, we analyzed data from the International Mouse Phenotyping Consortium (IMPC)  
 229 for *Gltd2*<sup>55</sup>. After controlling for body weight, there was a significant ( $P=1.5 \times 10^{-3}$ )  
 230 increase in BMD in male *Gltd2*<sup>-/-</sup> and no effect ( $P=0.88$ ) in female *Gltd2*<sup>-/-</sup> mice (sex

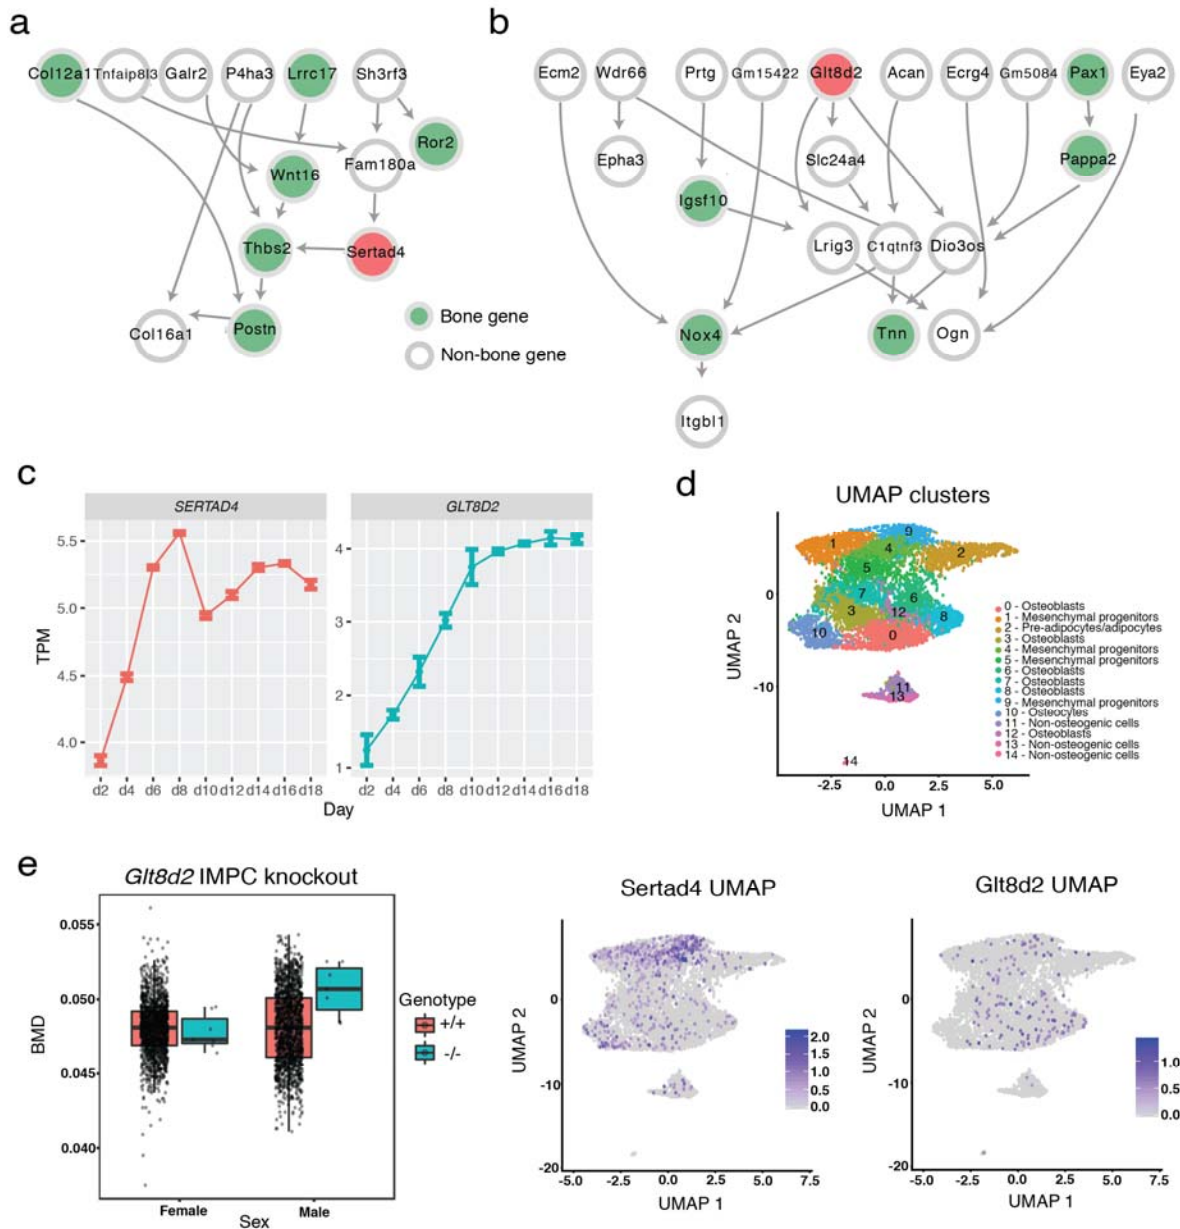

**Figure 2. Identifying *SERTAD4* and *GLT8D2* as putative regulators of BMD.** **a)** Local 3-step neighborhood around *Sertad4*. Known bone genes highlighted in green. *Sertad4* highlighted in red. **b)** Local 3-step neighborhood around *Gltd2*. Known bone genes highlighted in green. *Gltd2* highlighted in red. **c)** Expression of *Sertad4* and *Gltd2* in calvarial osteoblasts. **d)** Single cell RNA-seq expression data. Each point represents a cell. The top panel shows UMAP clusters and their corresponding cell-type. The bottom two panels show the expression of *Sertad4* and *Gltd2*. **e)** Bone mineral density in *Gltd2* knockout mice from the IMPC.

231 interaction  $P= 6.9 \times 10^{-3}$ ) (**Figure 2E**). These data were consistent with the effect  
232 direction predicted by the human *GLT8D2* eQTL and eBMD GWAS data where the  
233 effect allele of the lead eBMD SNP (rs2722176) was associated with increased *GLT8D2*  
234 expression and decreased BMD. Together, these data suggest that *SERTAD4* and  
235 *GLT8D2* are causal for their respective BMD GWAS associations and they likely impact  
236 BMD through a role in modulating osteoblast-centric processes.

237

### 238 **Identification of QTLs for strength-related traits in the DO:**

239 The other key limitation of human genetic studies of osteoporosis has been the strict  
240 focus on BMD, though many other aspects of bone influence its strength. To directly  
241 address this limitation using the DO, we performed GWAS for 55 complex skeletal traits.  
242 This analysis identified 28 genome-wide significant (permutation-derived  $P<0.05$ ) QTLs  
243 for 20 traits mapping to 10 different loci (defined as QTL with peaks within a 1.5 Mbp  
244 interval) (**Table 2 and Supplemental Figure 2**). These data are presented interactively  
245 in a web-based tool (<https://qtlviewer.uvadcos.io/>). Of the 10 loci, four impacted a single  
246 trait (e.g., medial-lateral femoral width (ML) QTL on Chr2@145.4Mbp), while the other  
247 six had apparent pleiotropic effects on more than one trait (e.g., cortical bone  
248 morphology traits, cortical tissue mineral density (TMD), and cortical porosity (Ct.Por)  
249 QTL on Chr1@155Mbp). The 95% confidence intervals (CIs) for the 21 autosomal  
250 associations ranged from 615 Kbp to 5.4 Mbp with a median of 1.4 Mbp.

251

252

253 **Table 2. QTL identified for complex skeletal traits in the DO**

| Locus | Trait                       | LOD  | Chr | Position (Mbp) | 95% CI        | # missense variants | Genes with colocalizing eQTL                                |
|-------|-----------------------------|------|-----|----------------|---------------|---------------------|-------------------------------------------------------------|
| 1     | ML                          | 10   | 1   | 155.4          | 155.1 - 155.7 | 7                   | <i>ler5, Qsox1</i>                                          |
| 1     | <a href="#">Ma.Ar</a>       | 12.8 | 1   | 155.3          | 155.1 - 155.7 | 7                   | <i>ler5, Qsox1</i>                                          |
| 1     | <a href="#">Tt.Ar</a>       | 11.5 | 1   | 155.2          | 155.1 - 156.2 | 7                   | <i>ler5, Qsox1</i>                                          |
| 1     | TMD                         | 23.9 | 1   | 155.1          | 154.8 - 155.6 | 7                   | <i>ler5</i>                                                 |
| 1     | Ct.Por                      | 11.4 | 1   | 155.4          | 155.1 - 156.4 | 7                   | <i>ler5, Qsox1</i>                                          |
| 1     | pMOI                        | 8.8  | 1   | 155.1          | 154.8 - 158.2 | 7                   | <i>ler5, Qsox1</i>                                          |
| 1     | lmax                        | 8.3  | 1   | 155.1          | 155.1 - 158.2 | 7                   | <i>ler5, Qsox1</i>                                          |
| 1     | <a href="#">Ct.Ar/Tt.Ar</a> | 8.5  | 1   | 155.3          | 154.3 - 155.7 | 7                   | <i>ler5, Qsox1</i>                                          |
| 2     | ML                          | 7.9  | 2   | 145.4          | 144.1 - 145.6 | -                   | -                                                           |
| 3     | <a href="#">Ma.Ar</a>       | 8.8  | 3   | 68.1           | 66.6 - 70     | 8                   | <i>Mfsd1, Il12a, Gm17641, 1110032F04Rik</i>                 |
| 4     | <a href="#">Ma.Ar</a>       | 8    | 4   | 114.6          | 113 - 118.4   | -                   | -                                                           |
| 4     | <a href="#">Tt.Ar</a>       | 8.2  | 4   | 114.6          | 113.6 - 114.8 | -                   | -                                                           |
| 5     | <a href="#">Ct.Ar/Tt.Ar</a> | 8.1  | 4   | 127.7          | 125.4 - 128.1 | -                   | <i>Csf3r, Gm12946, Clspn, Ncdn, Gm12941, Zmym6, Gm25600</i> |
| 6     | BMD                         | 7.8  | 8   | 103.5          | 102.7 - 104.4 | -                   | -                                                           |
| 7     | Dfx                         | 10.7 | 10  | 23.7           | 23.3 - 24.6   | -                   | -                                                           |
| 7     | DFmax                       | 9.4  | 10  | 23.7           | 21.8 - 25.2   | -                   | <i>C920009B18Rik</i>                                        |
| 7     | W                           | 13.6 | 10  | 24.3           | 23.5 - 24.6   | -                   | -                                                           |
| 7     | Wpy                         | 11.9 | 10  | 23.8           | 23.5 - 25.3   | -                   | <i>Rps12, Slc18b1, Stx7</i>                                 |
| 7     | TMD                         | 14.6 | 10  | 23.5           | 23.1 - 24.6   | -                   | -                                                           |
| 8     | Fmax                        | 8.8  | 16  | 23.3           | 22.3 - 23.4   | -                   | -                                                           |
| 8     | Ffx                         | 8.2  | 16  | 23.1           | 22.6 - 23.4   | -                   | -                                                           |
| 9     | <a href="#">Ct.Ar</a>       | 13.5 | X   | 59.4           | 58.4 - 71.2   | -                   | -                                                           |
| 9     | pMOI                        | 10.4 | X   | 59.4           | 58.4 - 61.4   | -                   | -                                                           |
| 9     | lmax                        | 11   | X   | 59.5           | 58.4 - 69.6   | -                   | -                                                           |
| 9     | lmin                        | 8.4  | X   | 59.5           | 57.3 - 61.2   | -                   | <i>Zic3</i>                                                 |
| 10    | TbSp                        | 8.6  | X   | 73.8           | 72.7 - 77.5   | -                   | <i>Pls3</i>                                                 |
| 10    | Tb.N                        | 7.9  | X   | 74             | 72.7 - 76.8   | -                   | <i>Fundc2, Cmc4, Pls3</i>                                   |
| 10    | <a href="#">Ct.Th</a>       | 9.9  | X   | 73.4           | 58.4 - 74.1   | -                   | -                                                           |

254

255

256 **Overlap with human BMD GWAS:**

257 We anticipated the genetic analysis of bone strength traits in DO mice would uncover novel  
258 biology not captured by human BMD GWAS. To evaluate this prediction, we identified overlaps  
259 between the 10 identified mouse loci and 1103 human BMD GWAS associations<sup>5</sup>. Of the 10  
260 mouse loci, the human syntenic regions (**Supplemental Table 9**) for six (60%) contained at  
261 least one independent GWAS association (**Supplemental Figure 3**). We calculated the number  
262 expected by chance by randomly selecting 10 human regions (of the same size) 1000 times and  
263 identifying overlaps. Six overlaps corresponded to the 56<sup>th</sup> percentile of the null distribution.  
264 While it is impossible at this point to know how many of the identified mouse QTL involve genes  
265 that influence BMD, these results are consistent with the idea that some of the QTL in the DO  
266 are due to genes involved in processes influencing aspects of bone other than BMD.

267

268 **Identification of potentially causal genes:**

269 For each locus, we defined the causal gene search space as the widest confidence interval  
270 given all QTL start and end positions  $\pm 250$  Kbp. We then used merge analysis to identify likely  
271 causal genes. Merge analyses were performed by imputing all known variants from the genome  
272 sequences of the eight founders onto haplotype reconstructions for each DO mouse and then  
273 performing single variant association tests. We focused on variants in the top 15% of each  
274 merge analysis as those are most likely to be causal<sup>56</sup>.

275

276 We next identified missense variants that were top merge analysis variants common to all QTL  
277 in a locus. We identified seven missense variants in locus 1, and eight missense variants in  
278 locus 3 (**Table 2**). Of the seven missense variants in locus 1, three (rs243472661, rs253446415,  
279 and rs33686629) were predicted to be deleterious by SIFT. They are all variants in the  
280 uncharacterized protein coding gene *BC034090*. In locus 3, three (rs250291032, rs215406048  
281 and rs30914256) were predicted to be deleterious by SIFT (**Supplemental Table 10**). These

282 variants were located in myeloid leukemia factor 1 (*Mif1*), Iqgj and Schip1 fusion protein  
283 (*Iqschfp*), and Retinoic acid receptor responder 1 (*Rarres1*), respectively.

284

285 We next used the cortical bone RNA-seq data to map 10,399 local eQTL (**Supplemental Table**  
286 **11**). Of these, 174 local eQTL regulated genes located within bone trait QTL. To identifying  
287 colocalizing eQTL, we identified trait QTL/eQTL pairs whose top merge analysis variants  
288 overlapped. This analysis identified 18 genes with colocalizing eQTL in 6 QTL loci (**Table 2**).

289

### 290 **Characterization of a QTL on Chromosome 1 influencing bone geometry:**

291 Locus 1 (Chr1) influenced cortical bone geometry (Ma.Ar, total cross sectional area (Tt.Ar),  
292 medial-lateral femoral width (ML), polar moment of inertia (pMOI), cortical bone area fraction  
293 (Ct.Ar/Tt.Ar), and maximum moment of inertia ( $I_{max}$ )), tissue mineral density (TMD), and cortical  
294 porosity (Ct.Por) (**Figure 3A**). We focused on this locus due to its pleiotropic nature, strong  
295 effect size, and the identification of candidate genes (*Ier5*, *Qsox1*, and *BC034090*) (**Table 2**).  
296 Additionally, we had previously measured ML in two independent cohorts of DO mice from  
297 earlier generations and a QTL scan of those data uncovered the presence of a similar QTL on  
298 Chr1 (**Supplemental Figure 4**). The identification of this locus across two different DO cohorts  
299 (which differed in generations, diets, and ages) provided robust replication justifying further  
300 analysis.

301

302 We next tested if the locus pleiotropically affected all traits or if it was due to multiple linked  
303 QTL. We primarily tested the hypothesis that the genetic effects on bone geometry and TMD  
304 were distinct (as one might expect). The non-reference alleles of the top merge analysis  
305 variants for each QTL were private to WSB/EiJ. To test if these variants explained all QTL, we  
306 performed the same association scans for each trait, but included the genotype of the lead ML  
307 QTL variant (rs50769082; 155.46 Mbp; ML was used as a proxy for all the cortical morphology



308 traits) as an additive covariate. This led to the ablation of all QTL except for TMD which  
 309 remained significant (**Figure 3B**). We then repeated the analysis using the lead TMD QTL  
 310 variant (rs248974780; 155.06 Mbp) as an additive covariate (**Figure 3C**). This led to the  
 311 ablation of all QTLs. These results supported the presence of at least two loci both driven by

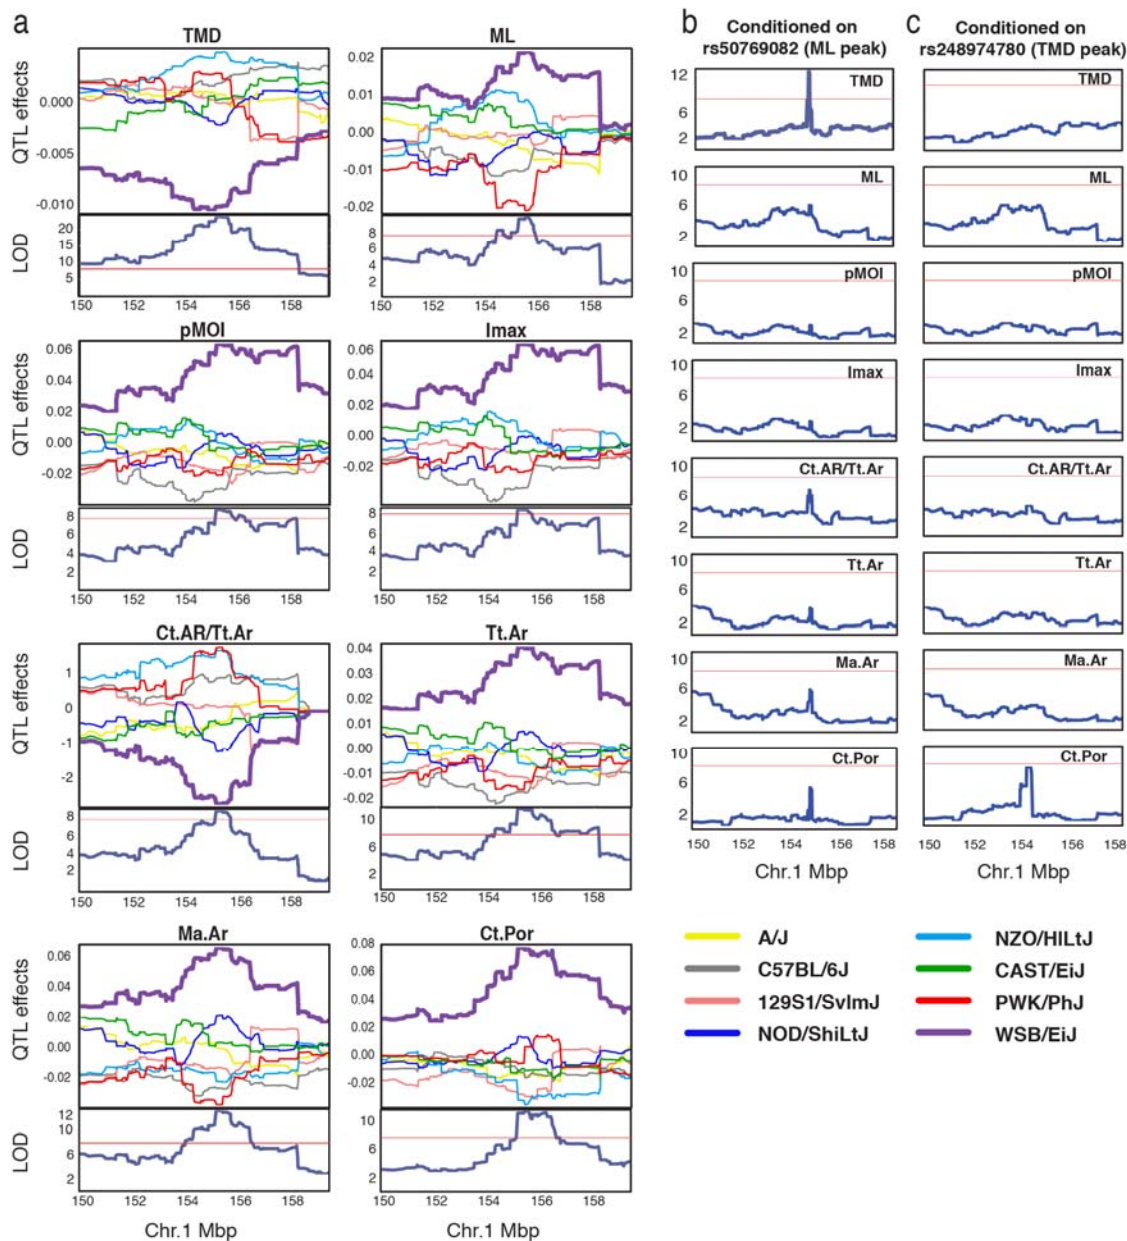

**Figure 3. QTL (locus 1) on chromosome 1.** **a**) For each plot, the top panel shows allele effects for the DO founders for each of the 8 QTL across an interval on chromosome 1 (Mbp, colors correspond to the founder allele in the legend). Bottom panels show each respective QTL scan. The red horizontal lines represent LOD score thresholds (Genome-wide  $P \leq 0.05$ ). **b**) QTL scans across the same interval as panel (A), after conditioning on rs50769082. **c**) QTL scans after conditioning on rs248974780.

312 WSB/EiJ alleles, one influencing cortical bone geometry and Ct.Por and the other TMD.

313

314 **Qsox1 is responsible for the effect of locus 1 on cortical bone geometry:**

315 Given the importance of bone geometry to strength, we sought to focus on identifying the  
316 gene(s) underlying locus 1 impacting cortical bone geometry. We re-evaluated candidate genes  
317 in light of the evidence for two distinct QTL. Immediate Early Response 5 (*Ier5*) and quiescin  
318 sulfhydryl oxidase 1 (*Qsox1*) were identified as candidates based on the eQTL analysis and  
319 *BC034090* as a candidate based on nonsynonymous variants (**Table 2**). Interestingly, *Ier5* and  
320 *Qsox1* eQTL colocalized with all QTL, except the TMD QTL, where only *Ier5* colocalized (**Table**  
321 **2 and Figure 4A**). We cannot exclude the involvement of the nonsynonymous variants in  
322 *BC034090*; however, without direct evidence that they impacted *BC034090* function, we put  
323 more emphasis on the eQTL. As a result, based on its colocalizing eQTL and known biological  
324 function (see below), we predicted that *Qsox1* was at least partially responsible for locus 1.

325

326 QSOX1 is the only known secreted catalyst of disulfide bond formation and a regulator of  
327 extracellular matrix integrity<sup>57</sup>. It has not been previously linked to skeletal development. We  
328 found that *Qsox1* was highly expressed in calvarial osteoblasts and its expression decreased  
329 ( $P=6.4 \times 10^{-6}$ ) during differentiation (**Figure 4B**). In scRNA-seq on bone marrow-derived stromal  
330 cells, we observed *Qsox1* expression in all osteogenic cells with its highest expression seen in a  
331 cluster of mesenchymal progenitors defined by genes involved in skeletal development such as  
332 *Grem2*, *Lmna*, and *Prrx2* (cluster 1) (**Supplemental Table 12 and Figure 4C**). Additionally, in  
333 the DO cortical bone RNA-seq data, *Qsox1* was highly co-expressed with many key regulators  
334 of skeletal development and osteoblast activity (e.g., *Runx2*;  $\rho=0.48$ ,  $P<2.2 \times 10^{-16}$ , *Lrp5*;  
335  $\rho=0.41$ ,  $P=6.2 \times 10^{-9}$ ).

336 To directly test the role of *Qsox1*, we used CRISPR/Cas9 to generate *Qsox1* mutant mice. We  
 337 generated five different mutant lines harboring unique mutations, including two 1-bp frameshifts,  
 338 a 171-bp in-frame deletion of the QSOX1 catalytic domain, and two large deletions (756 bp and  
 339 1347 bp) spanning most of the entire first exon of *Qsox1* (**Figure 5A, Supplemental Tables 13**  
 340 **and 14**). All five mutations abolished QSOX1 activity in serum (**Figure 5B**). Given the uniform  
 341 lack of QSOX1 activity, we  
 342 combined phenotypic data  
 343 from all lines to evaluate  
 344 the effect of QSOX1  
 345 deficiency on bone. We  
 346 hypothesized based on the  
 347 genetic and eQTL data,  
 348 that QSOX1 deficiency  
 349 would increase all traits  
 350 mapping to locus 1, except  
 351 TMD. Consistent with this  
 352 prediction, ML was  
 353 increased in male  
 354 ( $P=4.17 \times 10^{-11}$ ) and female  
 355 ( $P=0.012$ ) mice as a  
 356 function of *Qsox1* mutant  
 357 genotype (**Figure 5C**).  
 358 Also consistent with the  
 359 genetic data, we observed  
 360 no difference in other

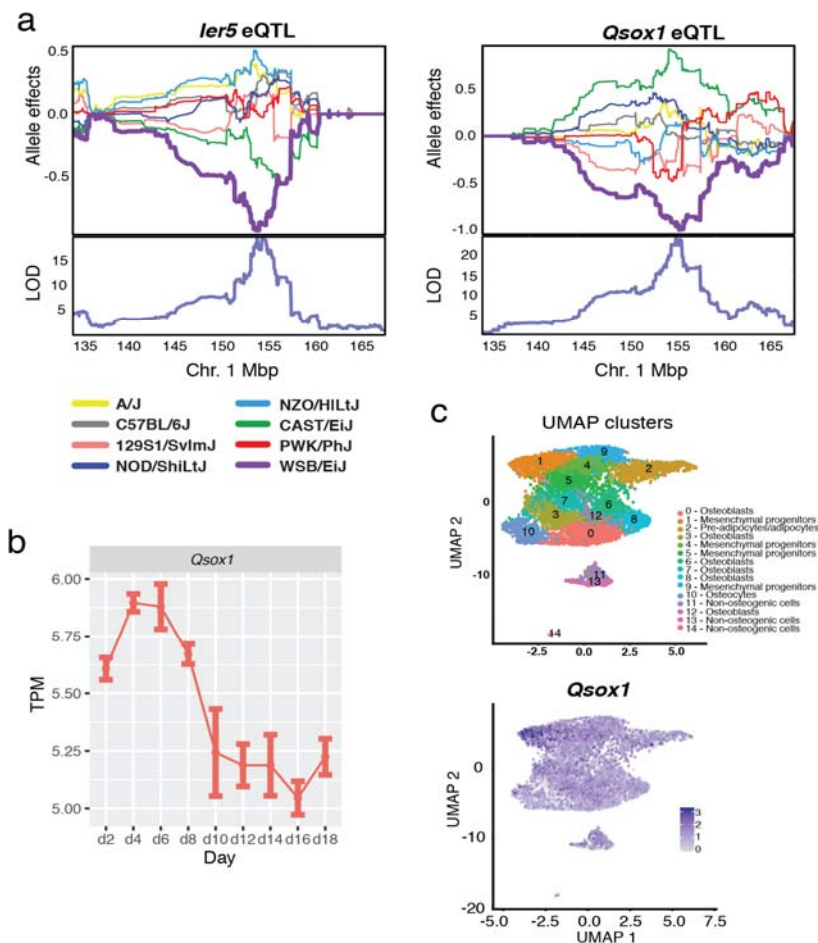

**Figure 4. Characterization of *Qsox1*.** **a**) The top panel shows allele effects for the DO founders for *ler5* and *Qsox1* expression on an interval on chromosome 1 (Mbp, colors correspond to the founder allele in the legend). Y-axis units are best linear unbiased predictors (BLUPs). Bottom panels show each respective QTL scan. LOD score threshold for autosomal eQTL is 10.89 ( $\alpha=0.05$ ). **b**) *Qsox1* expression in calvarial osteoblasts. **c**) Single cell RNA-seq expression data. Each point represents a cell. The top panel shows UMAP clusters and their corresponding cell-type. The bottom panel shows the expression of *Qsox1*.

361 gross morphological traits including femoral anterior-posterior femoral width (AP) ( $P=0.17$ ) and  
 362 femoral length (FL) ( $P=0.99$ ). We next focused on male  $Qsox1^{+/+}$  and  $Qsox1^{-/-}$  mice and used  
 363 microCT to measure other bone parameters. We observed increased pMOI ( $P=0.02$ ) (**Figure**  
 364 **5D**),  $I_{max}$  ( $P=0.009$ ) (**Figure 5E**), and Ct.Ar/Tt.Ar ( $P=0.031$ ) (**Figure 5F**). Total area (Tt.Ar)  
 365 (**Figure 5G**) was increased, but the difference was only suggestive ( $P=0.08$ ). Marrow area  
 366 (Ma.Ar,  $P=0.93$ ) was not  
 367 different (**Figure 5H**). We  
 368 observed no change in  
 369 TMD ( $P=0.40$ ) (**Figure 5I**).  
 370 We also observed no  
 371 difference in cortical  
 372 porosity (Ct.Por) ( $P=0.24$ )  
 373 (**Figure 5J**).  
 374  
 375 Given the strength of locus  
 376 1 on bone geometry and  
 377 its association with  
 378 biomechanical strength,  
 379 we were surprised the  
 380 locus did not impact  
 381 femoral strength. Typically,  
 382 in four-point bending  
 383 assays, the force is  
 384 applied along the AP axis.  
 385 We replicated this in

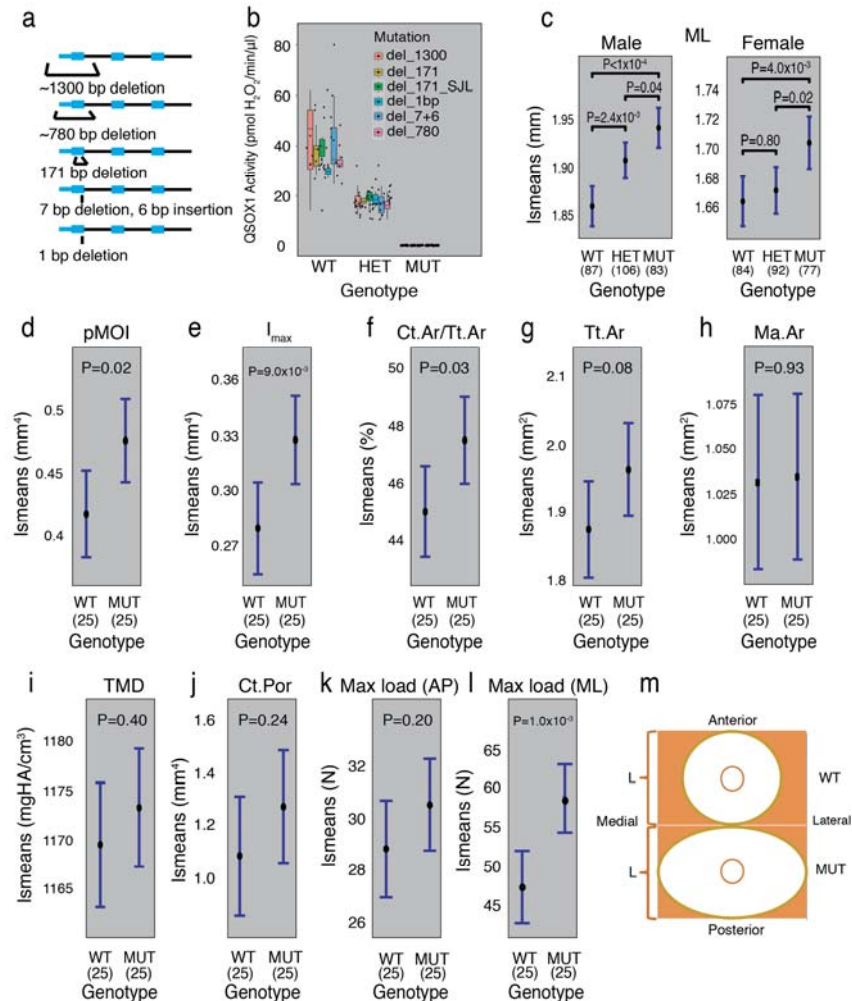

386 femurs from *Qsox1<sup>+/+</sup>* and *Qsox1<sup>-/-</sup>* mice and saw no significant impact on strength ( $P=0.20$ )  
387 (**Figure 5K**). However, when we tested femurs by applying the force along the ML axis, we  
388 observed a significant increase in strength in *Qsox1<sup>-/-</sup>* femurs ( $P=1.0 \times 10^{-3}$ ) (**Figure 5L**).  
389 Overall, these data demonstrate that absence of QSOX1 activity leads to increased cortical  
390 bone accrual specifically along the ML axis (**Figure 5M**).

391

## 392 **Discussion:**

393 Human GWASs for BMD have identified over 1000 loci. However, progress in causal  
394 gene discovery has been slow and BMD explains only part of the variance in bone  
395 strength and the risk of fracture<sup>7</sup>. The goal of this study was to demonstrate that  
396 systems genetics in DO mice can help address these limitations. Towards this goal, we  
397 used cortical bone RNA-seq data in the DO and a network-based approach to identify  
398 46 genes likely causal for BMD GWAS loci. Nine of the 46 were novel. We provide  
399 further evidence supporting the causality of two of these genes, *SERTAD4* and  
400 *GLT8D2*. Furthermore, GWAS in the DO identified 28 QTLs for a wide-range of strength  
401 associated traits. From these data, *Qsox1* was identified as a novel genetic determinant  
402 of cortical bone mass and strength. These data highlight the power of systems genetics  
403 in the DO and demonstrate the utility of mouse genetics to inform human GWAS and  
404 bone biology.

405

406 To inform BMD GWAS, we generated Bayesian networks for cortical bone and used  
407 them to identify BANs. Our analysis was similar to “key driver” analyses<sup>25–27</sup> where the  
408 focus has often been on identifying genes with strong evidence ( $P_{\text{adj}} < 0.05$ ) of playing  
409 central roles in networks. In contrast, we used BAN analysis as a way to rank genes

410 based on the likelihood that they are involved in a biological process important to bone  
411 (based on network connections to genes known to play a role in bone biology). We then  
412 honed in on those genes most likely to be responsible for BMD GWAS associations by  
413 identifying BANs regulated by human eQTL that colocalize with BMD GWAS loci.  
414 Together, a gene being both a BAN in a GWAS locus and having a colocalizing eQTL is  
415 strong support of causality. This is supported by the observation that 80% of the 46  
416 BANs with colocalizing eQTL were bona fide regulators of BMD.

417

418 One advantage of our network approach was the ability to not only identify causal  
419 genes, but also to use network information to predict the cell-type through which these  
420 genes are likely acting. We demonstrate this idea by investigating the two novel BANs  
421 with colocalizing eQTL from the royalblue\_M module. The royalblue\_M module was  
422 enriched in genes involved in bone formation and ossification, suggesting that the  
423 module as a whole and its individual members were involved in osteoblast-driven  
424 processes. This prediction was supported by the role of genes in osteoblasts that were  
425 directly connected to *Sertad4* and *Glt8d2*, the expression of the two genes in  
426 osteoblasts, and for *Glt8d2*, its regulation of BMD *in vivo*. Little is known regarding the  
427 specific biological processes that are likely impacted by *Sertad4* and *Glt8d2* in  
428 osteoblasts; however, it will be possible to utilize this information in future experiments  
429 designed to investigate their specific molecular functions. For example, *Sertad4* was  
430 connected to *Wnt16*, *Ror2*, and *Postn* all of which play roles in various aspects of  
431 osteoblast/osteocyte function. Wnt signaling is a major driver of osteoblast-mediated  
432 bone formation and skeletal development<sup>58</sup>. Interestingly, *Wnt16* and *Ror2* play central

433 roles in canonical (*Wnt16*) and non-canonical (*Ror2* in the *Wnt5a/Ror2* pathway) Wnt  
434 signaling<sup>59</sup> and have been shown to physically interact in chondrocytes<sup>60</sup>. *Postn* has  
435 also been shown to influence Wnt signaling<sup>60,61</sup>. These data suggest a possible role for  
436 *Sertad4* in Wnt signaling.

437

438 Despite their clinical importance, we know little about the genetics of bone traits other  
439 than BMD. Here, we set out to address this knowledge gap. Using the DO, we identified  
440 28 QTL for a wide-range of complex bone traits. The QTL were mapped at high-  
441 resolution, most had 95% CIs < 1 Mbp<sup>18</sup>. This precision, coupled with merge and eQTL  
442 analyses, allowed us to identify a small number of candidate genes for many loci.

443 Overlap of existing human BMD GWAS association and mouse loci was no more than  
444 what would be expected by chance, suggesting that our approach has highlighted  
445 biological processes impacting bone that are independent of those with the largest  
446 effects on BMD. This new knowledge has the potential to lead to novel pathways which  
447 could be targeted therapeutically to increase bone strength. Future studies extending  
448 the work presented here will lead to the identification of additional genes and further our  
449 understanding of genetics of a broad range of complex skeletal traits.

450

451 Disulfide bonds are critical to the structure and function of numerous proteins<sup>62</sup>. Most  
452 disulfide bonds are formed in the endoplasmic reticulum<sup>63</sup>; however, the discovery of  
453 QSOX1 demonstrated that disulfide bonds in proteins can be formed extracellularly<sup>57</sup>.  
454 Ilani *et al.*<sup>57</sup> demonstrated that fibroblasts deficient in QSOX1 had a decrease in the  
455 number of disulfide bonds in matrix proteins. Moreover, the matrix formed by these cells

456 was defective in supporting cell-matrix adhesion and lacked incorporation of the alpha-4  
457 isoform of laminin. QSOX1 has also been associated with perturbation of the  
458 extracellular matrix in the context of cancer and tumor invasiveness<sup>64,65</sup>. It is unclear at  
459 this point how QSOX1 influences cortical bone mass; however, it likely involves  
460 modulation of the extracellular matrix.

461

462 In summary, we have used a systems genetics analysis in DO mice to inform human  
463 GWAS and identify novel genetic determinants for a wide-range of complex skeletal  
464 traits. Through the use of multiple synergistic approaches, we have expanded our  
465 understanding of the genetics of BMD and osteoporosis. This work has the potential to  
466 serve as a framework for how to use the DO, and other mouse genetic reference  
467 populations, to complement and inform human genetic studies of complex disease.

468



469 **Acknowledgements:**

470 Research reported in this publication was supported in part by the National Institute of  
471 Arthritis and Musculoskeletal and Skin Diseases of the National Institutes of Health  
472 under Award Number AR057759 to C.J.R., M.C.H., and C.R.F. B.A-B was supported in  
473 part by a National Institutes of Health, Biomedical Data Sciences Training Grant  
474 (5T32LM012416). The authors acknowledge Wenhao Xu (University of Virginia) and the  
475 Genetically Engineered Mouse Models (GEMM) core and the University of Virginia  
476 Cancer Center Support Grant (CCSG) P30CA044579 from NCI for their support  
477 generating *Qsox1* mutant mice. The authors also acknowledge the Yale School of  
478 Medicine Department of Orthopaedics and Rehabilitation's Histology and  
479 Histomorphometry Laboratory for all their work. We thank Matt Vincent (The Jackson  
480 Laboratory) and Gary Churchill (The Jackson Laboratory) for developing the QTL  
481 Viewer software and Neal Magee (University of Virginia) for hosting QTL Viewer on  
482 UVA servers. We thank the IMPC for accessibility to BMD data on *Gltd2* knockout  
483 mice ([www.mousephenotype.org](http://www.mousephenotype.org)). The data used for the analyses described in this  
484 manuscript were obtained from the IMPC Portal on 11/5/19. The Genotype-Tissue  
485 Expression (GTEx) Project was supported by the Common Fund of the Office of the  
486 Director of the National Institutes of Health, and by NCI, NHGRI, NHLBI, NIDA, NIMH,  
487 and NINDS. The data used for the analyses described in this manuscript were obtained  
488 from the GTEx Portal on 01/15/18.

489

490 **METHODS:**

491 **Diversity Outbred mouse population and tissue harvesting:** A total of 619 (315  
492 males, 304 females) Diversity Outbred (J:DO, JAX stock #0039376) mice, across 11  
493 generations (gens. 23-33) were procured from The Jackson Laboratory at 4 weeks of  
494 age. DO mice were fed standard chow, and were injected with calcein (30 mg/g body  
495 weight) both 7 days and 1 day prior to sacrifice. Mice were weighed and fasted 24 hours  
496 prior to sacrifice. Mice were sacrificed at approximately 12 weeks of age (mean: 12.4  
497 weeks). Immediately prior to sacrifice, mice were anesthetized with isoflurane, nasal-  
498 anal length was recorded and blood collected via submandibular bleeding. At sacrifice,  
499 femoral morphology (length and width) was measured with digital calipers (Mitoyuto  
500 American, Aurora, IL). Right femora were wrapped in PBS soaked gauze and stored in  
501 PBS at -20°C. Right tibiae were stored in 70% EtOH at room temperature. Left femora  
502 were flushed of bone marrow (which was snap frozen and stored in liquid nitrogen, see  
503 below – Single cell RNA-seq of bone marrow stromal cells) and were immediately  
504 homogenized in Trizol. Homogenates were stored at -80°C. Left tibiae were stored in  
505 10% neutral buffered formalin at 4°C. Tail clips were collected and stored at -80°C.  
506

507 **Measurement of trabecular and cortical microarchitecture:** Right femora were  
508 scanned using a 10  $\mu\text{m}$  isotropic voxel size on a desktop  $\mu\text{CT}40$  (Scanco Medical AG,  
509 Brüttisellen, Switzerland), following the Journal of Bone and Mineral Research  
510 guidelines for assessment of bone microstructure in rodents<sup>66</sup>. Trabecular bone  
511 architecture was analyzed in the endocortical region of the distal metaphysis. Variables  
512 computed for trabecular bone regions include: bone volume, BV/TV, trabecular number,

513 thickness, separation, connectivity density and the structure model index, a measure of  
514 the plate versus rod-like nature of trabecular architecture. For cortical bone at the  
515 femoral midshaft, total cross-sectional area, cortical bone area, medullary area, cortical  
516 thickness, cortical porosity and area moments of inertia about principal axes were  
517 computed.

518

519 **Biomechanical testing:** The right femur from each mouse was loaded to failure in four-  
520 point bending in the anterior to posterior direction, such that the posterior quadrant is  
521 subjected to tensile loads. The widths of the lower and upper supports of the four-point  
522 bending apparatus are 7 mm and 3 mm, respectively. Tests were conducted with a  
523 deflection rate of 0.05 mm/s using a servohydraulic materials test system (Instron Corp.,  
524 Norwood, MA). The load and mid-span deflection were acquired directly at a sampling  
525 frequency of 200 Hz. Load-deflection curves were analyzed for strength (maximum  
526 load), stiffness (the slope of the initial portion of the curve), post-yield deflection, and  
527 total work. Post-yield deflection, which is a measure of ductility, is defined as the  
528 deflection at failure minus the deflection at yield. Yield is defined as a 10% reduction of  
529 stiffness relative to the initial (tangent) stiffness. Work, which is a measure of  
530 toughness, is defined as the area under the load-deflection curve. Femora were tested  
531 at room temperature and kept moist with phosphate buffered saline during all tests.

532

533 **Assessment of bone marrow adipose tissue (MAT):** Fixed right tibiae, dissected free  
534 of soft tissues, were decalcified in EDTA for 20 days, changing the EDTA every 3-4  
535 days and stained for lipid using a 1:1 mixture of 2% aqueous osmium tetroxide (OsO<sub>4</sub>)

536 and 5% potassium dichromate. Decalcified bones were imaged using  $\mu$ CT performed in  
537 water with energy of 55 kVp, an integration time of 500 ms, and a maximum isometric  
538 voxel size of 10  $\mu$ m (the “high” resolution setting with a 20mm sample holder) using a  
539  $\mu$ CT35 (Scanco). To determine the position of the MAT within the medullary canal and  
540 to determine its change in volume, the bone was overlaid. MAT was recorded in 4  
541 dimensions.

542

543 **Histomorphometry:** Fixed right tibiae were sequentially dehydrated and infiltrated in  
544 graded steps with methyl methacrylate. Blocks were faced and 5  $\mu$ m non-decalcified  
545 sections cut and stained with toluidine blue to observe gross histology. This staining  
546 allows for the observation of osteoblast and osteoclast numbers, amount of  
547 unmineralized osteoid and the presence of mineralized bone. Histomorphometric  
548 parameters were analyzed on a computerized tablet using Osteomeasure software  
549 (Osteometrics, Atlanta, GA). Histomorphometric measurements were made on a fixed  
550 region just below the growth plate corresponding to the primary spongiosa.

551

552 **RNA isolation, sequencing and quantification:** Total RNA was isolated from marrow-  
553 depleted homogenates of the left femora, using the mirVana™ miRNA Isolation Kit (Life  
554 Technologies, Carlsbad, CA). Total RNA-Seq libraries were constructed using Illumina  
555 TruSeq Stranded Total RNA HT sample prep kits. Samples were sequenced to an  
556 average of 39 million 2 x 75 bp paired-end reads (total RNA-seq) on an Illumina  
557 NextSeq500 sequencer in the University of Virginia Center for Public Health Genomics  
558 Genome Sciences Laboratory (GSL). A custom bioinformatics pipeline was used to

559 quantify RNA-seq data. Briefly, RNA-seq FASTQ files were quality controlled using  
560 FASTQC <sup>67</sup>, aligned to the mm10 genome assembly with HISAT2 <sup>68</sup>, and quantified with  
561 Stringtie <sup>69</sup>. Read count information was then extracted with a Python script provided by  
562 the Stringtie website (prepDE.py). Finally, we filtered our gene set to include genes that  
563 had more than 6 reads, and more than 0.1 transcripts per million (TPM), in more than  
564 38 samples (20% of all samples). Sequencing data is available on GEO (GSE152708).

565

566 **Mouse genotyping:** DNA was collected from mouse tails using the PureLink Genomic  
567 DNA mini kit (Invitrogen). DNA was used for genotyping with the GigaMUGA array <sup>19</sup> by  
568 Neogen Genomics (GeneSeek; Lincoln, NE). Genotyping reports were pre-processed  
569 for use with the qtl2 R package <sup>70 71</sup>, and genotypes were encoded using directions and  
570 scripts from ([kbroman.org/qtl2/pages/prep\\_do\\_data.html](http://kbroman.org/qtl2/pages/prep_do_data.html)). Quality control was  
571 performed using the Argyle R package <sup>72</sup>, where samples were filtered to contain no  
572 more than 5% no calls and 50% heterozygous calls. Samples that failed QC were re-  
573 genotyped. Furthermore, genotyping markers were filtered to contain only tier 1 and tier  
574 2 markers. Markers that did not uniquely map to the genome were also removed.  
575 Finally, a qualitative threshold for the maximum number of no calls and a minimum  
576 number of homozygous calls was used to filter markers.

577 We calculated genotype and allele probabilities, as well as kinship matrices using the  
578 qtl2 R package. Genotype probabilities were calculated using a hidden Markov model  
579 with an assumed genotyping error probability of 0.002, using the Carter-Falconer map  
580 function. Genotype probabilities were then reduced to allele probabilities, and allele  
581 probabilities were used to calculate kinship matrices, using the “leave one chromosome

582 out” (LOCO) parameter. Kinship matrices were also calculated using the “overall”  
583 parameter for heritability calculations.

584 Further quality control was then performed <sup>73</sup>, which led to the removal of several  
585 hundred more markers that had greater than 5% genotyping errors, after which  
586 genotype and allele probabilities and kinship matrices were recalculated. As another  
587 metric for quality control, we calculated the frequencies of the eight founder genotypes  
588 of the DO.

589

590 **WGCNA network construction:** Gene counts, as obtained above were pruned to  
591 remove genes that had fewer than 10 reads in more than 90% of samples. Variance  
592 stabilizing transformation (DeSeq2 <sup>74</sup>) was applied, followed by RNA-seq batch  
593 correction using sex and age at sacrifice in days as covariates, using ComBat (“sva” R  
594 package <sup>75</sup>). We then used the “WGCNA” R package to generate signed co-expression  
595 networks with a soft thresholding power of 4 (power=5 for male networks) <sup>76,77</sup>. We used  
596 the “blockwiseModules” function to construct networks with a merge cut height of 0.15  
597 and minimum module size of 30. WGCNA networks had 39, 45 and 40 modules for the  
598 sex-combined, female and male networks, respectively.

599 **Bayesian network learning:** Bayesian networks for each WGCNA module were  
600 learned with the “bnlearn” R package <sup>78</sup>. Specifically, expression data for genes within a  
601 WGCNA module was obtained as above (WGCNA network construction), and these  
602 data were used to learn the structure of the underlying Bayesian network using the Max-  
603 Min Hill Climbing algorithm (function “mmhc” in bnlearn).

604 **Construction of “known bone gene” list:** We constructed a list of bone genes using  
605 Gene Ontology (GO) terms and the Mouse Genome Informatics (MGI) database<sup>79 80</sup>.  
606 Using AmiGO2, we downloaded GO terms for “osteo\*”, “bone” and “ossif\*”<sup>81</sup>. The  
607 resulting GO terms were pruned to remove some terms that were not related to bone  
608 function or regulation. We then used the MGI data table to convert human genes to their  
609 mouse homologs. We also downloaded human and mouse genes from MGI which had  
610 the terms “osteoporosis”, “bone mineral density”, “osteoblast”, “osteoclast”, and  
611 “osteocyte”. Human genes were converted to their mouse counterparts as above. GO  
612 and MGI derived genes were merged and duplicates were removed, resulting in the  
613 known bone gene set.

614 **Bone Associated Node (BAN) analysis:** We used a custom script that utilized the  
615 “igraph” R package to perform BAN analysis<sup>82</sup>. Briefly, within a Bayesian network  
616 underlying a WGCNA module, we counted the number of neighbors for each gene,  
617 based on a neighborhood step size of 3. Neighborhood sizes also included the gene  
618 itself. BANs were defined as genes that were more highly connected to bone genes  
619 than would be expected by chance. We merged all genes from all BNs together in a  
620 matrix, and removed genes that were unconnected or only connected to 1 neighbor  
621 (neighborhood size  $\leq 2$ ). We then pruned all genes whose neighborhood size was  
622 greater than 1 standard deviation less than the mean neighborhood size across all  
623 modules.

624 Then, for each gene, we calculated if they were more connected to bone genes in our  
625 bone list (see construction of bone list above) than expected by chance using the  
626 hypergeometric distribution (phyper, R “stats” package). The arguments were as

627 follows:  $q$ : (number of genes in neighborhood that are also bone genes) – 1;  $m$ : total  
628 number of bone genes in our bone gene set;  $n$ : (number of genes in networks prior to  
629 pruning) –  $m$ ;  $k$ : neighborhood size of the respective gene; `lower.tail = false`. False  
630 discovery rates were calculated using `p.adjust()`.

631 **GWAS-eQTL colocalization:** We converted mouse genes with evidence of being a  
632 BAN ( $P \leq 0.05$ ) to their human homologs using the MGI homolog data table. If the  
633 human homolog was within 1Mbp of a GWAS association, we obtained all eQTL  
634 associations within +/- 200 kb of the GWAS association in all 48 tissues of version 7 of  
635 the Gene-Tissue Expression Project (GTEx). These variants were overlapped with the  
636 GWAS variants, and colocalization was performed using the R “coloc” package, using  
637 the `coloc.abf()` function<sup>83</sup>. Genes were considered colocalizing if  $PPH4 \geq 0.75$ .

638

639 **Gene ontology:** Gene ontology analysis for WGCNA modules was performed for each  
640 individual module using the “topGO” package in R<sup>84</sup>. Enrichment tests were performed  
641 for the “Molecular Function”, “Biological Process” and “Cellular Component” ontologies,  
642 using all genes in the network. Enrichment was performed using the “classic” algorithm  
643 with Fisher’s exact test. P-values were not corrected for multiple testing.

644 **Assessing the expression of *Glt8d2* and *Sertad4* in publicly available bone cell**

645 **data:** We used bioGPS expression data from GEO (GSE10246) to assay the  
646 expression of *Sertad4*, *Glt8d2*, and *Qsox1* in osteoblasts and osteoclasts<sup>45</sup>. We also  
647 downloaded the data from GEO (GSE54461) to query expression in primary calvarial  
648 osteoblasts.



649 **Analysis of BMD data on *Rasd1*<sup>-/-</sup> mice from the IMPC:** The International Mouse  
650 Knockout Consortium<sup>55</sup> and the IMPC<sup>85</sup> have generated and phenotyped mice  
651 harboring null alleles for *Glt8d2* (*Glt8d2*<sup>tm1a(KOMP)Wtsi</sup>, *Glt8d2*<sup>-/-</sup>) (N=7 females and N=7  
652 males). Phenotypes for the appropriate controls (C57BL/6) were also collected  
653 (N=1,466 females and N=1,477 males). A description of the battery of phenotypes  
654 collected on mutants can be found at  
655 (<https://www.mousephenotype.org/impress/PipelineInfo?id=4>). The mice were 14  
656 weeks of age at DEXA scanning and both sexes for both mutants were included. We  
657 downloaded raw BMD, body weight and metadata for *Glt8d2* mutants from the IMPC  
658 webportal (<http://www.mousephenotype.org>). These data were analyzed using the  
659 PhenStat R package<sup>86</sup>. PhenStat was developed to analyze data generated by the  
660 IMPC in which a large number of wild-type controls are phenotyped across a wide-time  
661 range in batches and experimental mutant animals are tested in small groups  
662 interspersed among wild-type batches. We used the Mixed Model framework in  
663 PhenStat to analyze BMD data. The mixed model framework starts with a full model  
664 (with fixed effects of genotype, sex, genotype x sex and weight and batch as a random  
665 effect) and ends with final reduced model and genotype effect evaluation procedures  
666 <sup>86,87</sup>.

667 **QTL mapping:** Phenotypes that notably deviated from normality were log<sub>10</sub>-transformed  
668 (the MAT phenotypes as well as PYD and  $W_{py}$  were transformed after a constant of 1  
669 was added). Then, QTL mapping with a single-QTL model was performed via a linear  
670 mixed model using the “scan1” function of the “qtl2” R package. A kinship matrix as  
671 calculated by the “leave one chromosome out” method was included. Mapping

672 covariates were sex, age at sacrifice in days, bodyweight, and DO mouse generation.  
673 Peaks were then identified with a minimum LOD score of 4 and a peak drop of 1.5  
674 LODs. To identify significant QTL peaks, we permuted each phenotype scan 1000 times  
675 (using the “scan1perm” function of the “qtl2” package) with the same mapping  
676 covariates as above, and calculated the significance threshold for each phenotype at a  
677 5% significance level. Heritability for the phenotypes was calculated using the  
678 “est\_herit” function of the “qtl2” R package, using the same covariates as above, but  
679 with a kinship matrix that was calculated using the “overall” argument.

680 **eQTL mapping:** Variance stabilizing transformation was applied to gene read counts  
681 from above using the “DESeq2” R package, followed by quantile-based inverse Normal  
682 transformation<sup>88</sup>. Then, hidden determinants of gene expression were calculated from  
683 these transformed counts, using Probabilistic Estimation of Expression Residuals  
684 (PEER)<sup>89</sup>. 48 PEER factors were calculated using no intercept or covariates. Sex and  
685 the 48 PEER covariates were used as mapping covariates, and eQTL mapping was  
686 performed using the “scan1” function, as above. To calculate a LOD score threshold, we  
687 randomly chose 50 genes and permuted them 1000 times, as above. Since all genes  
688 were transformed to conform to the same distribution, we found that using 50 was  
689 sufficient. Thresholds were set as the highest permuted LOD score each for autosomal  
690 chromosomes and the X-chromosome (10.89 and 11.55 LODs, respectively). Finally,  
691 we identified peaks as above, and defined eQTL as peaks that exceeded the LOD  
692 threshold and were no more than 1Mbp away from their respective transcript’s start site,  
693 as defined by the Stringtie output.

694 **Merge analysis:** For each QTL or eQTL peak, we imputed all variants within the 95%  
695 confidence interval of a peak, and tested each variant for association with the respective  
696 trait. This was performed using the “scan1snps” function of the “qtl2” R package, with  
697 the same mapping covariates for QTL or eQTL, respectively. Then, we identified “top”  
698 variants by taking variants that were within 85% of the maximum SNP association’s  
699 LOD score. For conditional analyses using a variant, we performed the same QTL scan  
700 as above, but included the genotype of the respective SNP as an additive mapping  
701 covariate, encoding it as a 0, 0.5 or 1, for homozygous alternative, heterozygous or  
702 homozygous reference, respectively.

703 **BMD GWAS overlap:** To identify BMD GWAS loci that overlapped with our DO mouse  
704 associations, we defined a mouse association locus as the widest confidence interval  
705 given all QTL start and end CI positions mapping to each locus. We then used the  
706 UCSC liftOver tool<sup>90</sup> (minimum ratio of bases that must remap = 0.1, minimum hit size  
707 in query = 100000) to convert the loci from mm10 to their syntenic hg19 positions. We  
708 then took all genome-wide significant SNPs ( $P.NI \leq 5 \times 10^{-8}$ ) from the Morris GWAS for  
709 eBMD, and identified variants that overlapped with the syntenic mouse loci  
710 (“GenomicRanges” R package<sup>91</sup>).

711 **SIFT annotations:** SIFT annotations for merge analysis missense variants were  
712 queried using Ensembl’s Variant Effect Predictor tool  
713 (<https://useast.ensembl.org/Tools/VEP>)<sup>92</sup>. All options were left as default.

714 **Prior ML QTL mapping:** The cohorts used for the earlier QTL mapping of ML consisted  
715 of 577 Diversity Outbred mice from breeding generations G10 and G11<sup>93</sup>. G10 cohort

716 mice consisted of both males and females fed a standard chow diet, and were  
717 euthanized and analyzed at 12–15 weeks of age. G11 cohort mice were all females fed  
718 either a high-fat, cholesterol-containing (HFC) diet or a low-fat, high protein diet, and  
719 were euthanized and analyzed at 24–25 weeks of age. Mice were weighed and then  
720 euthanized by CO<sub>2</sub> asphyxiation followed by cervical dislocation. Carcasses were frozen  
721 at -80°C. Subsequently, the femur was dissected and length, AP width, and ML width  
722 was measured two independent times to 0.01 mm using digital calipers. Mice were  
723 genotyped using the MegaMUGA SNP array (GeneSeek; Lincoln, NE) designed with  
724 77,800 SNP markers, and QTL mapping was performed as above, but with the inclusion  
725 of sex, diet, age and weight at sacrifice as additive covariates.

726 **Generation of *Qsox1* mutant mice:** *Qsox1* knockout mice used in this study were  
727 generated using the CRISPR/Cas9 genome editing technique essentially as reported in  
728 <sup>94</sup>. *Qsox1* knockout mice used in this study were generated using the CRISPR/Cas9  
729 genome editing technique essentially as reported in <sup>94</sup>. Briefly, Cas9 enzyme that was  
730 injected into B6SJLF2 embryos (described below) was purchased from (PNA Bio) while  
731 the guide RNA (sgRNA) was designed and synthesized as follows: the 20 nucleotide  
732 (nt) sequence that would be used to generate the sgRNA was chosen using the  
733 CRISPR design tool developed by the Zhang lab (crispr.mit.edu). The chosen sequence  
734 and its genome map position is homologous to a region in Exon 1 that is ~225 bp, 3' of  
735 the translation start site and ~20bp 5' of the Exon1/Intron1 boundary (**Supplemental**  
736 **Table 15**). To generate the sgRNA that would be used for injections oligonucleotides of  
737 the chosen sequence, as well as the reverse complement (**Supplemental Table 15**),  
738 primers 1 and 2, respectively), were synthesized such that an additional 4 nts (CACC

739 and AAAC) were added at the 5' ends of the oligonucleotides for cloning purposes.  
740 These oligonucleotides were annealed to each other by combining equal molar  
741 amounts, heating to 90°C for 5 min. and allowing the mixture to passively cool to room  
742 temperature. The annealed oligonucleotides were combined with BbsI digested pX330  
743 plasmid vector (provided by the Zhang lab through Addgene; <https://www.addgene.org/>)  
744 and T4 DNA ligase (NEB) and subsequently used to transform Stbl3 competent bacteria  
745 (Thermo Fisher) following the manufacturer's' protocols. Plasmid DNAs from selected  
746 clones were sequenced from primer 3 (**Supplemental Table 15**) and DNA that  
747 demonstrated accurate sequence and position of the guide were used for all  
748 downstream applications. The DNA template used in the synthesis of the sgRNA was  
749 the product of a PCR using the verified plasmid DNA and primers 4 and 5  
750 (**Supplemental Table 15**). The sgRNA was synthesized via *in vitro* transcription (IVT)  
751 by way of the MAXIscript T7 kit (Thermo Fisher) following the manufacturer's protocol.  
752 sgRNAs were purified and concentrated using the RNeasy Plus Micro kit (Qiagen)  
753 following the manufacturer's protocol.  
754  
755 B6SJLF1 female mice (Jackson Laboratory) were super-ovulated and mated with  
756 B6SJLF1 males. The females were sacrificed and the fertilized eggs (B6SJLF2  
757 embryos) were isolated from the oviducts. The fertilized eggs were co-injected with the  
758 purified Cas9 enzyme (50 ng/μl) and sgRNA (30 ng/μl) under a Leica inverted  
759 microscope equipped with Leitz micromanipulators (Leica Microsystems). Injected eggs  
760 were incubated overnight in KSOM-AA medium (Millipore Sigma). Two-cell stage  
761 embryos were implanted on the following day into the oviducts of pseudo pregnant ICR

762 female mice (Envigo). Pups were initially screened by PCR of tail DNA using primers 6  
763 and 7 with subsequent sequencing of the resultant product from primer 8, when the  
764 PCR products suggested a relatively large deletion had occurred in at least one of the  
765 alleles (**Supplemental Table 15**). For those samples which indicated a small or no  
766 deletion had occurred PCR of tail DNA using primers 9 and 10 was performed with  
767 subsequent sequencing of the resultant products from primer 11 (**Supplemental Table**  
768 **15**). Finally, deletions were fully characterized by ligating, with T4 DNA ligase (NEB),  
769 the PCR products from either primer pairs 6/7 or 9/10 with the plasmid vector pCR 2.1  
770 (Thermo Fisher) followed by transformation of One Shot Top 10 chemically competent  
771 cells (Thermo Fisher) following the manufacturers recommendations (**Supplemental**  
772 **Tables 13 and 14**).

773 The resulting founder mice (see **Supplemental Table 13**) were mated to C57BL/6J  
774 mice (Jackson Laboratory), with CRISPR/Cas9-deletion heterozygous F1 offspring from  
775 the 1<sup>st</sup> and 2<sup>nd</sup> litters mated to generate the F2 offspring used in the study of bone  
776 related properties reported herein. In addition, mouse B (**Supplemental Table 13**) was  
777 subsequently mated to an SJL/J male (Jackson Laboratory), and the F2 offspring from  
778 the heterozygous F1 crosses, as outlined above, were also used in this study. All F1  
779 and F2 mice from all deletion 'strains' were genotyped using primer pairs 9/10, with the  
780 PCR products sequenced from primer 11 for mice possessing the 7+6 and 1bp  
781 deletions (**Supplemental Table 15**). An additional PCR using primers 6 and 7 was  
782 performed with tail DNA from mice carrying the 1347 bp and 756 bp deletions; the  
783 products from this 2<sup>nd</sup> PCR assisted in determining between heterozygous and  
784 homozygous deleted genotypes (**Supplemental Table 15**).

785 ML was measured for both femurs using calipers on a population of F2 mice and ML  
786 was averaged between the two femurs. A linear model with genotype, mutation type,  
787 length, and weight was generated separately for males and females. Lsmeans were  
788 calculated using the “emmeans” R package<sup>95</sup>.

789 We randomly selected 50 male F2 mice (25 wt + 25 mut) from the same population, and  
790 microarchitectural phenotypes were measured as above, but on left femurs. Bone  
791 strength was measured as above but in both the AP and ML orientations. A linear model  
792 with genotype, mutation type and weight was generated, and lsmeans were calculated  
793 using the “emmeans” R package<sup>95</sup>.

794 **Measuring Qsox1 activity in serum:** Serum was collected via submandibular bleeding  
795 from isoflurane anesthetized mice, prior to sacrifice and isolation of femurs for bone trait  
796 analysis. Blood samples were incubated at room temperature for 20-30 m followed by  
797 centrifugation at 2000 x g for 10 m at 4°C. The supernatants were transferred to fresh  
798 tubes and centrifuged again as described above. The 2<sup>nd</sup> supernatant of each sample  
799 was separated into 50-100 µl aliquots, snap frozen on dry ice and stored at -70°C. Only  
800 ‘clear’ serum samples were used for determining QSOX1 activity, because pink-red  
801 colored samples had slight-moderate activity, presumably due to sulfhydryl oxidase  
802 enzymes released from lysed red blood cells.

803

804 Sulfhydryl oxidase activity was determined as outlined in Israel *et al.*, 2014<sup>96</sup> with minor  
805 modifications. Briefly, serum samples were thawed on wet ice whereupon 5 µl was  
806 used in a 200 µl final reaction volume which consisted of 50 mM KPO<sub>4</sub>, pH7.5, 1mM  
807 EDTA (both from Sigma), 10 µM Amplex UltraRed (Thermo Fisher), 0.5% (v/v) Tween

808 80 (Surfact-Amps, low peroxide; Thermo Fisher), 50 nM Horseradish Peroxide (Sigma),  
809 and initiated with the addition of dithiothreitol (Sigma) to 50  $\mu$ M initial concentration.  
810 The reactions were monitored with the 'high-sensitive dsDNA channel' of a Qubit  
811 Fluorimeter (Thermo Fisher) by measuring the fluorescence every 15-30s for 10m. The  
812 assay was calibrated by adding varying concentrations (0-3.2  $\mu$ M) of freshly diluted  
813 H<sub>2</sub>O<sub>2</sub> (Sigma) to the reaction mixture minus serum. Enzyme activity was expressed in  
814 units of (pmol H<sub>2</sub>O<sub>2</sub>/min/ $\mu$ l serum) and typically calculated within the first several  
815 minutes of the reaction for wild-type and heterozygous mutant mice. It was calculated  
816 using the entire 10m of the reaction for homozygous mutant genotypes.

817

#### 818 **Single cell RNA-seq of bone marrow stromal cells:**

819 *Bone marrow isolation:* The left femur was isolated and cleaned thoroughly of all muscle  
820 tissue followed by removal of its distal epiphysis. The marrow was exuded by  
821 centrifugation at 2000 x g for 30 seconds into a sterile tube containing 35  $\mu$ l freezing  
822 media (90% FBS, 10% DMSO). The marrow was then triturated 6 times on ice after  
823 addition of 150  $\mu$ l ice cold freezing media and again after further addition of 1ml ice cold  
824 freezing media until no visible clumps remained prior to being placed into a Mr. Frosty  
825 Freezing Container (Thermo Scientific) and stored overnight at -80° C. Samples were  
826 transferred the following day to liquid nitrogen for long term storage.

827

828 *Bone marrow culturing:* Previously frozen bone marrow samples were thawed at 37° C,  
829 resuspended into 5 ml bone marrow growth media (Alpha MEM, 10% FBS, 1%  
830 Pen/Strep, 0.01% Glutamax), pelleted in a Sorvall tabletop centrifuge at 1000 rpm for 5



831 minutes at room temperature and then subjected to red blood cell lysis by resuspending  
832 and triturating the resultant pellet into 5 ml 0.2% NaCl for 20 seconds, followed by  
833 addition and thorough mixing of 1.6% NaCl. Cells were pelleted again, resuspended into  
834 1 ml bone marrow growth media, plated into one well per sample of a 48 well tissue  
835 culture plate and placed into a 37° C, 5% CO<sub>2</sub> incubator undisturbed for 3 days post-  
836 plating, at which time the media was aspirated, cells were washed with 1 ml DPBS once  
837 and bone marrow growth media was replaced at 300 µl volume. The was process was  
838 repeated through day 5 post-plating. At day 6 post-plating, cells were washed in same  
839 manner; however, bone marrow growth media was replaced with 300 µl bone marrow  
840 differentiation media (Alpha MEM, 10% FBS, 1% Penicillin Streptomycin, 0.01%  
841 Glutamax, 50mg/ml Ascorbic Acid, 1M B-glycerophosphate, 100uM Dexamethasome).  
842 Cultures were then washed in same manner every other day for the following 10 days.  
843  
844 *RNA isolation:* The isolation procedure outlined below was inspired by Hanna *et al.*<sup>97</sup>  
845 Mineralized cultures were washed twice with Dulbecco's Phosphate Buffered Saline  
846 (DPBS). 0.5ml 60mM EDTA (pH 7.4, made in DPBS) was added for 15-minute room  
847 temperature (RT) incubation. EDTA solution was aspirated and replaced for a second  
848 15-minute RT incubation. Cultures were then washed with 0.5ml Hank's Balanced Salt  
849 Solution (HBSS) and incubated with 0.5ml 8mg/ml collagenase in HBSS/4mM CaCl<sub>2</sub> for  
850 10 minutes at 37° C with shaking. Cultures were triturated 10x and incubated for an  
851 additional 20 minutes and 37° C. Cultures were then transferred to a 1.5ml Eppendorf  
852 tube, and spun at 500 x g for 5 minutes at RT in a Sorvall tabletop centrifuge. Cultures  
853 were resuspended in 0.5ml 0.25% trypsin-EDTA (Gibco, Gaithersburg, MD) and

854 incubated for 15 minutes at 37° C. Cultures were then triturated and incubated for an  
855 additional 15 minutes. 0.5ml of media were added, triturated and spun at 500 x g for 5  
856 minutes at RT. Cultures were then resuspended in 0.5ml bone marrow differentiation  
857 media and cells were counted.

858

859 *Library preparation, sequencing and analysis:* The samples were pooled and  
860 concentrated to 800 cells/μl in sterile PBS supplemented with 0.1% BSA. The single cell  
861 suspension was loaded into a 10x Chromium Controller (10X Genomics, Pleasanton,  
862 CA, USA), aiming to capture 8,000 cells, with the Single Cell 3' v2 reagent kit, according  
863 to the manufacturer's protocol. Following GEM capturing and lysis, cDNA was amplified  
864 (13 cycles) and the manufacturer's protocol was followed to generate sequencing  
865 library. The library was sequenced on the Illumina NextSeq500 and the raw sequencing  
866 data was processed using CellRanger toolkit (version 2.0.1). The reads were mapped to  
867 mm10 mouse reference genome assembly using STAR (version 2.5.1b)<sup>98</sup>. Sequencing  
868 data is available on GEO (GSE152806).

869

870 Analysis was performed using Seurat<sup>99,100</sup>. Features detected in at least 3 cells where at  
871 least 200 features were detected were used. We then filtered out cells with less than  
872 800 reads and more than 5800 reads, as well as cells with 10% or more mitochondrial  
873 reads. Expression measurements were multiplied by 10,000 and log normalized, and  
874 the 3000 most variable features were identified. The data were then scaled. Cells were  
875 then scored by cell cycle markers, and these scores, as well as the percentage of  
876 mitochondrial reads, were regressed out<sup>101</sup>. Finally, clusters were found with a

877 resolution of 1 and the UMAP was generated. An outlier cluster consisting of 13 cells  
878 was removed.

879

880 **Data availability:**

881 Code is available at [https://github.com/basel-maher/DO\\_project](https://github.com/basel-maher/DO_project). Genotype probabilities,  
882 phenotypic data, trait QTL, and eQTL are available at <http://qtlviewer.uvadcos.io/>. Raw  
883 sequencing data is available from the NCBI Gene Expression Omnibus database  
884 (GSE152708, GSE152806). Raw genotyping data is available upon request.

885

886 **REFERENCES:**

- 887 1. Black, D. M. & Rosen, C. J. Clinical Practice. Postmenopausal Osteoporosis. *N. Engl. J.*  
888 *Med.* **374**, 254–262 (2016).
- 889 2. Burge, R. *et al.* Incidence and economic burden of osteoporosis-related fractures in the  
890 United States, 2005-2025. *J. Bone Miner. Res.* **22**, 465–475 (2007).
- 891 3. Estrada, K. *et al.* Genome-wide meta-analysis identifies 56 bone mineral density loci and  
892 reveals 14 loci associated with risk of fracture. *Nat. Genet.* **44**, 491–501 (2012).
- 893 4. Kemp, J. P. *et al.* Identification of 153 new loci associated with heel bone mineral density  
894 and functional involvement of GPC6 in osteoporosis. *Nat. Genet.* **49**, 1468–1475 (2017).
- 895 5. Morris, J. A. *et al.* An atlas of genetic influences on osteoporosis in humans and mice. *Nat.*  
896 *Genet.* **51**, 258–266 (2019).
- 897 6. Richards, J. B., Zheng, H.-F. & Spector, T. D. Genetics of osteoporosis from genome-wide  
898 association studies: advances and challenges. *Nat. Rev. Genet.* **13**, 576–588 (2012).
- 899 7. Sabik, O. L. & Farber, C. R. Using GWAS to identify novel therapeutic targets for  
900 osteoporosis. *Transl. Res.* **181**, 15–26 (2017).
- 901 8. Nadeau, J. H. & Dudley, A. M. Genetics. Systems genetics. *Science* **331**, 1015–1016  
902 (2011).
- 903 9. Civelek, M. & Lusis, A. J. Systems genetics approaches to understand complex traits. *Nat.*  
904 *Rev. Genet.* **15**, 34–48 (2014).
- 905 10. GTEx Consortium *et al.* Genetic effects on gene expression across human tissues. *Nature*  
906 **550**, 204–213 (2017).
- 907 11. Al-Barghouthi, B. M. & Farber, C. R. Dissecting the Genetics of Osteoporosis using  
908 Systems Approaches. *Trends Genet.* **35**, 55–67 (2019).
- 909 12. Dufresne, T. E., Chmielewski, P. A., Manhart, M. D., Johnson, T. D. & Borah, B.  
910 Risedronate preserves bone architecture in early postmenopausal women in 1 year as  
911 measured by three-dimensional microcomputed tomography. *Calcif. Tissue Int.* **73**, 423–

- 912 432 (2003).
- 913 13. Cummings, S. R. *et al.* Improvement in spine bone density and reduction in risk of vertebral  
914 fractures during treatment with antiresorptive drugs. *Am. J. Med.* **112**, 281–289 (2002).
- 915 14. Lochmüller, E.-M. *et al.* Correlation of Femoral and Lumbar DXA and Calcaneal Ultrasound,  
916 Measured In Situ with Intact Soft Tissues, with the In Vitro Failure Loads of the Proximal  
917 Femur. *Osteoporosis International* vol. 8 591–598 (1998).
- 918 15. Melton, L. J., III, Chrischilles, E. A., Cooper, C., Lane, A. W. & Riggs, B. L. How Many  
919 Women Have Osteoporosis? *J. Bone Miner. Res.* **20**, 886–892 (2005).
- 920 16. Churchill, G. A., Gatti, D. M., Munger, S. C. & Svenson, K. L. The Diversity Outbred mouse  
921 population. *Mamm. Genome* **23**, 713–718 (2012).
- 922 17. Logan, R. W., Robledo, R. F. & Recla, J. M. High-precision genetic mapping of behavioral  
923 traits in the diversity outbred mouse population. *Genes Brain Behav.* (2013).
- 924 18. Svenson, K. L. *et al.* High-resolution genetic mapping using the Mouse Diversity outbred  
925 population. *Genetics* **190**, 437–447 (2012).
- 926 19. Morgan, A. P. *et al.* The Mouse Universal Genotyping Array: From Substrains to  
927 Subspecies. *G3* **6**, 263–279 (2015).
- 928 20. Karasik, D. *et al.* Heritability and Genetic Correlations for Bone Microarchitecture: The  
929 Framingham Study Families. *J. Bone Miner. Res.* **32**, 106–114 (2017).
- 930 21. Ng, A. H. M., Wang, S. X., Turner, C. H., Beamer, W. G. & Grynepas, M. D. Bone quality and  
931 bone strength in BXH recombinant inbred mice. *Calcif. Tissue Int.* **81**, 215–223 (2007).
- 932 22. Turner, C. H. *et al.* Variation in bone biomechanical properties, microstructure, and density  
933 in BXH recombinant inbred mice. *J. Bone Miner. Res.* **16**, 206–213 (2001).
- 934 23. Schlecht, S. H. & Jepsen, K. J. Functional integration of skeletal traits: an intraskeletal  
935 assessment of bone size, mineralization, and volume covariance. *Bone* **56**, 127–138  
936 (2013).
- 937 24. Zhang, B. & Horvath, S. A general framework for weighted gene co-expression network

- 938 analysis. *Stat. Appl. Genet. Mol. Biol.* **4**, Article17 (2005).
- 939 25. Watson, C. T. *et al.* Integrative transcriptomic analysis reveals key drivers of acute peanut  
940 allergic reactions. *Nat. Commun.* **8**, 1943 (2017).
- 941 26. Huan, T. *et al.* Integrative network analysis reveals molecular mechanisms of blood  
942 pressure regulation. *Mol. Syst. Biol.* **11**, 799 (2015).
- 943 27. Wang, I.-M. *et al.* Systems analysis of eleven rodent disease models reveals an  
944 inflammatome signature and key drivers. *Mol. Syst. Biol.* **8**, 594 (2012).
- 945 28. Mäkinen, V.-P. *et al.* Integrative genomics reveals novel molecular pathways and gene  
946 networks for coronary artery disease. *PLoS Genet.* **10**, e1004502 (2014).
- 947 29. Aguet, F. *et al.* The GTEx Consortium atlas of genetic regulatory effects across human  
948 tissues. *bioRxiv* 787903 (2019) doi:10.1101/787903.
- 949 30. Aguet, F. *et al.* Local genetic effects on gene expression across 44 human tissues. *bioRxiv*  
950 074450 (2016) doi:10.1101/074450.
- 951 31. Nakashima, K. *et al.* The novel zinc finger-containing transcription factor osterix is required  
952 for osteoblast differentiation and bone formation. *Cell* **108**, 17–29 (2002).
- 953 32. Balemans, W. *et al.* Increased bone density in sclerosteosis is due to the deficiency of a  
954 novel secreted protein (SOST). *Hum. Mol. Genet.* **10**, 537–543 (2001).
- 955 33. Brunkow, M. E. *et al.* Bone dysplasia sclerosteosis results from loss of the SOST gene  
956 product, a novel cystine knot-containing protein. *Am. J. Hum. Genet.* **68**, 577–589 (2001).
- 957 34. Gong, Y. *et al.* LDL receptor-related protein 5 (LRP5) affects bone accrual and eye  
958 development. *Cell* **107**, 513–523 (2001).
- 959 35. Little, R. D. *et al.* A mutation in the LDL receptor-related protein 5 gene results in the  
960 autosomal dominant high-bone-mass trait. *Am. J. Hum. Genet.* **70**, 11–19 (2002).
- 961 36. Boyden, L. M. *et al.* High bone density due to a mutation in LDL-receptor-related protein 5.  
962 *N. Engl. J. Med.* **346**, 1513–1521 (2002).
- 963 37. Kong, Y. Y. *et al.* OPGL is a key regulator of osteoclastogenesis, lymphocyte development

- 964 and lymph-node organogenesis. *Nature* **397**, 315–323 (1999).
- 965 38. Wong, B. R. *et al.* TRANCE (Tumor Necrosis Factor [TNF]-related Activation-induced  
966 Cytokine), a New TNF Family Member Predominantly Expressed in T cells, Is a Dendritic  
967 Cell-specific Survival Factor. *Journal of Experimental Medicine* vol. 186 2075–2080 (1997).
- 968 39. Yasuda, H. *et al.* Osteoclast differentiation factor is a ligand for  
969 osteoprotegerin/osteoclastogenesis-inhibitory factor and is identical to TRANCE/RANKL.  
970 *Proc. Natl. Acad. Sci. U. S. A.* **95**, 3597–3602 (1998).
- 971 40. Lacey, D. L. *et al.* Osteoprotegerin ligand is a cytokine that regulates osteoclast  
972 differentiation and activation. *Cell* **93**, 165–176 (1998).
- 973 41. Anderson, D. M. *et al.* A homologue of the TNF receptor and its ligand enhance T-cell  
974 growth and dendritic-cell function. *Nature* **390**, 175–179 (1997).
- 975 42. Wong, B. R. *et al.* The TRAF family of signal transducers mediates NF-kappaB activation  
976 by the TRANCE receptor. *J. Biol. Chem.* **273**, 28355–28359 (1998).
- 977 43. Wu, J., Glimcher, L. H. & Aliprantis, A. O. HCO<sub>3</sub><sup>-</sup>/Cl<sup>-</sup> anion exchanger SLC4A2 is required  
978 for proper osteoclast differentiation and function. *Proc. Natl. Acad. Sci. U. S. A.* **105**,  
979 16934–16939 (2008).
- 980 44. Duan, X., Yang, S., Zhang, L. & Yang, T. V-ATPases and osteoclasts: ambiguous future of  
981 V-ATPases inhibitors in osteoporosis. *Theranostics* **8**, 5379–5399 (2018).
- 982 45. Lattin, J. E. *et al.* Expression analysis of G Protein-Coupled Receptors in mouse  
983 macrophages. *Immunome Res.* **4**, 5 (2008).
- 984 46. Bennetts, J. S. *et al.* Evolutionary conservation and murine embryonic expression of the  
985 gene encoding the SERTA domain-containing protein CDCA4 (HEPP). *Gene* **374**, 153–165  
986 (2006).
- 987 47. Zhan, Y. *et al.* Mechanism of the effect of glycosyltransferase GLT8D2 on fatty liver. *Lipids*  
988 *Health Dis.* **14**, 43 (2015).
- 989 48. Movérare-Skrtic, S. *et al.* Osteoblast-derived WNT16 represses osteoclastogenesis and

- 990 prevents cortical bone fragility fractures. *Nat. Med.* **20**, 1279–1288 (2014).
- 991 49. Takeshita, S., Kikuno, R., Tezuka, K. & Amann, E. Osteoblast-specific factor 2: cloning of a  
992 putative bone adhesion protein with homology with the insect protein fasciclin I. *Biochem. J*  
993 **294 ( Pt 1)**, 271–278 (1993).
- 994 50. Horiuchi, K. *et al.* Identification and characterization of a novel protein, periostin, with  
995 restricted expression to periosteum and periodontal ligament and increased expression by  
996 transforming growth factor beta. *J. Bone Miner. Res.* **14**, 1239–1249 (1999).
- 997 51. Izu, Y., Ezura, Y., Koch, M., Birk, D. E. & Noda, M. Collagens VI and XII form complexes  
998 mediating osteoblast interactions during osteogenesis. *Cell Tissue Res.* **364**, 623–635  
999 (2016).
- 1000 52. Amiri, N. & Christians, J. K. PAPP-A2 expression by osteoblasts is required for normal  
1001 postnatal growth in mice. *Growth Horm. IGF Res.* **25**, 274–280 (2015).
- 1002 53. Wilm, B., Dahl, E., Peters, H., Balling, R. & Imai, K. Targeted disruption of Pax1 defines its  
1003 null phenotype and proves haploinsufficiency. *Proc. Natl. Acad. Sci. U. S. A.* **95**, 8692–  
1004 8697 (1998).
- 1005 54. Kimura, H., Akiyama, H., Nakamura, T. & de Crombrughe, B. Tenascin-W inhibits  
1006 proliferation and differentiation of preosteoblasts during endochondral bone formation.  
1007 *Biochem. Biophys. Res. Commun.* **356**, 935–941 (2007).
- 1008 55. Koscielny, G. *et al.* The International Mouse Phenotyping Consortium Web Portal, a unified  
1009 point of access for knockout mice and related phenotyping data. *Nucleic Acids Res.* **42**,  
1010 D802-9 (2014).
- 1011 56. Yalcin, B., Flint, J. & Mott, R. Using Progenitor Strain Information to Identify Quantitative  
1012 Trait Nucleotides in Outbred Mice. *Genetics* vol. 171 673–681 (2005).
- 1013 57. Ilani, T. *et al.* A secreted disulfide catalyst controls extracellular matrix composition and  
1014 function. *Science* **341**, 74–76 (2013).
- 1015 58. Huybrechts, Y., Mortier, G., Boudin, E. & Van Hul, W. WNT Signaling and Bone: Lessons



- 1016 From Skeletal Dysplasias and Disorders. *Front. Endocrinol.* **11**, 165 (2020).
- 1017 59. Teufel, S. & Hartmann, C. Wnt-signaling in skeletal development. *Curr. Top. Dev. Biol.* **133**,  
1018 235–279 (2019).
- 1019 60. Tong, W. *et al.* Wnt16 attenuates osteoarthritis progression through a PCP/JNK-mTORC1-  
1020 PTHrP cascade. *Ann. Rheum. Dis.* **78**, 551–561 (2019).
- 1021 61. Bonnet, N., Garnero, P. & Ferrari, S. Periostin action in bone. *Mol. Cell. Endocrinol.* **432**,  
1022 75–82 (2016).
- 1023 62. Rajpal, G. & Arvan, P. Chapter 236 - Disulfide Bond Formation. in *Handbook of Biologically*  
1024 *Active Peptides (Second Edition)* (ed. Kastin, A. J.) 1721–1729 (Academic Press, 2013).
- 1025 63. Bulleid, N. J. & Ellgaard, L. Multiple ways to make disulfides. *Trends in Biochemical*  
1026 *Sciences* vol. 36 485–492 (2011).
- 1027 64. Feldman, T. *et al.* Inhibition of fibroblast secreted QSOX1 perturbs extracellular matrix in  
1028 the tumor microenvironment and decreases tumor growth and metastasis in murine cancer  
1029 models. *Oncotarget* **11**, 386–398 (2020).
- 1030 65. Hanavan, P. D. *et al.* Ebselen inhibits QSOX1 enzymatic activity and suppresses invasion  
1031 of pancreatic and renal cancer cell lines. *Oncotarget* **6**, 18418–18428 (2015).
- 1032 66. Bouxsein, M. L. *et al.* Guidelines for assessment of bone microstructure in rodents using  
1033 micro-computed tomography. *J. Bone Miner. Res.* **25**, 1468–1486 (2010).
- 1034 67. Andrews, S. & Others. FastQC: a quality control tool for high throughput sequence data.  
1035 (2010).
- 1036 68. Kim, D., Paggi, J. M., Park, C., Bennett, C. & Salzberg, S. L. Graph-based genome  
1037 alignment and genotyping with HISAT2 and HISAT-genotype. *Nat. Biotechnol.* **37**, 907–915  
1038 (2019).
- 1039 69. Pertea, M. *et al.* StringTie enables improved reconstruction of a transcriptome from RNA-  
1040 seq reads. *Nat. Biotechnol.* **33**, 290–295 (2015).
- 1041 70. Team, R. C. & Others. R: A language and environment for statistical computing. (2013).

- 1042 71. Broman, K. W. *et al.* R/qtl2: Software for Mapping Quantitative Trait Loci with High-  
1043 Dimensional Data and Multiparent Populations. *Genetics* **211**, 495–502 (2019).
- 1044 72. Morgan, A. P. argyle: An R Package for Analysis of Illumina Genotyping Arrays. *G3* **6**,  
1045 281–286 (2015).
- 1046 73. Broman, K. W., Gatti, D. M., Svenson, K. L., Sen, S. & Churchill, G. A. Cleaning Genotype  
1047 Data from Diversity Outbred Mice. *G3* **9**, 1571–1579 (2019).
- 1048 74. Love, M. I., Huber, W. & Anders, S. Moderated estimation of fold change and dispersion for  
1049 RNA-seq data with DESeq2. *Genome Biol.* **15**, 550 (2014).
- 1050 75. Leek, J. T., Johnson, W. E., Parker, H. S., Jaffe, A. E. & Storey, J. D. The sva package for  
1051 removing batch effects and other unwanted variation in high-throughput experiments.  
1052 *Bioinformatics* **28**, 882–883 (2012).
- 1053 76. Langfelder, P. & Horvath, S. WGCNA: an R package for weighted correlation network  
1054 analysis. *BMC Bioinformatics* **9**, 559 (2008).
- 1055 77. Langfelder, P. & Horvath, S. Fast R Functions for Robust Correlations and Hierarchical  
1056 Clustering. *J. Stat. Softw.* **46**, (2012).
- 1057 78. Scutari, M. Learning Bayesian Networks with thebnlearnRPackage. *Journal of Statistical*  
1058 *Software* vol. 35 (2010).
- 1059 79. Ashburner, M. *et al.* Gene Ontology: tool for the unification of biology. *Nature Genetics* vol.  
1060 25 25–29 (2000).
- 1061 80. Blake, J. A. *et al.* The Mouse Genome Database (MGD): premier model organism resource  
1062 for mammalian genomics and genetics. *Nucleic Acids Res.* **39**, D842-8 (2011).
- 1063 81. Carbon, S. *et al.* AmiGO: online access to ontology and annotation data. *Bioinformatics* **25**,  
1064 288–289 (2009).
- 1065 82. Csardi, G., Nepusz, T. & Others. The igraph software package for complex network  
1066 research. *InterJournal, complex systems* **1695**, 1–9 (2006).
- 1067 83. Giambartolomei, C. *et al.* Bayesian Test for Colocalisation between Pairs of Genetic

- 1068 Association Studies Using Summary Statistics. *PLoS Genetics* vol. 10 e1004383 (2014).
- 1069 84. Alexa, A. Rahnenfuhrer J. topGO: enrichment analysis for Gene Ontology. 2010. *R*  
1070 *package version 2*, 45 (2017).
- 1071 85. Dickinson, M. E. *et al.* High-throughput discovery of novel developmental phenotypes.  
1072 *Nature* **537**, 508–514 (2016).
- 1073 86. Kurbatova, N., Karp, N., Mason, J. & Haselimashhadi, H. PhenStat: statistical analysis of  
1074 phenotypic data. *R package version 2*, (2015).
- 1075 87. West, B. T., Welch, K. B. & Galecki, A. T. *Linear Mixed Models: A Practical Guide Using*  
1076 *Statistical Software, Second Edition*. (CRC Press, 2014).
- 1077 88. Yang, J. *et al.* FTO genotype is associated with phenotypic variability of body mass index.  
1078 *Nature* **490**, 267–272 (2012).
- 1079 89. Stegle, O., Parts, L., Piipari, M., Winn, J. & Durbin, R. Using probabilistic estimation of  
1080 expression residuals (PEER) to obtain increased power and interpretability of gene  
1081 expression analyses. *Nat. Protoc.* **7**, 500–507 (2012).
- 1082 90. Hinrichs, A. S. *et al.* The UCSC Genome Browser Database: update 2006. *Nucleic Acids*  
1083 *Res.* **34**, D590-8 (2006).
- 1084 91. Lawrence, M. *et al.* Software for Computing and Annotating Genomic Ranges. *PLoS*  
1085 *Computational Biology* vol. 9 e1003118 (2013).
- 1086 92. McLaren, W. *et al.* The Ensembl Variant Effect Predictor. *Genome Biol.* **17**, 122 (2016).
- 1087 93. Shorter, J. R. *et al.* Quantitative trait mapping in Diversity Outbred mice identifies two  
1088 genomic regions associated with heart size. *Mamm. Genome* **29**, 80–89 (2018).
- 1089 94. Mesner, L. D. *et al.* Mouse genome-wide association and systems genetics identifies Lhfp  
1090 as a regulator of bone mass. *PLoS Genet.* **15**, e1008123 (2019).
- 1091 95. Russell, L. emmeans: Estimated Marginal Means, aka Least-Squares Means. *R package*  
1092 *version 1.4*. (2019).
- 1093 96. Israel, B. A., Jiang, L., Gannon, S. A. & Thorpe, C. Disulfide bond generation in mammalian

- 1094 blood serum: detection and purification of quiescin-sulfhydryl oxidase. *Free Radic. Biol.*  
1095 *Med.* **69**, 129–135 (2014).
- 1096 97. Hanna, H., Mir, L. M. & Andre, F. M. In vitro osteoblastic differentiation of mesenchymal  
1097 stem cells generates cell layers with distinct properties. *Stem Cell Res. Ther.* **9**, 203 (2018).
- 1098 98. Dobin, A. *et al.* STAR: ultrafast universal RNA-seq aligner. *Bioinformatics* **29**, 15–21 (2013).
- 1099 99. Butler, A., Hoffman, P., Smibert, P., Papalexi, E. & Satija, R. Integrating single-cell  
1100 transcriptomic data across different conditions, technologies, and species. *Nat. Biotechnol.*  
1101 **36**, 411–420 (2018).
- 1102 100. Stuart, T. *et al.* Comprehensive Integration of Single-Cell Data. *Cell* **177**, 1888-1902.e21  
1103 (2019).
- 1104 101. Tirosh, I. *et al.* Dissecting the multicellular ecosystem of metastatic melanoma by single-cell  
1105 RNA-seq. *Science* **352**, 189–196 (2016).

**Supplemental Figure 1. Characterization of the experimental cohort.** a) Allele frequency per chromosome, across the DO mouse cohort. b) Heritability for each trait. c) Bone volume fraction and max load across the DO cohort. Insets are micro-CT images representing low and high bone volume fraction.

**a**

bioRxiv preprint doi: <https://doi.org/10.1101/2020.06.24.169839>; this version posted June 24, 2020. The copyright holder for this preprint (which was not certified by peer review) is the author/funder, who has granted bioRxiv a license to display the preprint in perpetuity. It is made available under aCC-BY-NC 4.0 International license.

Global allele frequency per chromosome

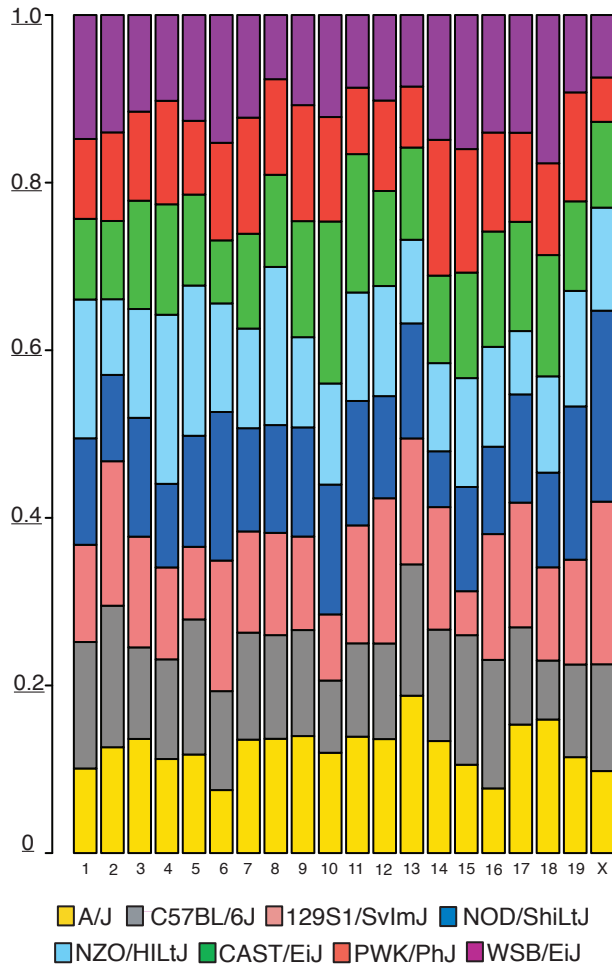

**b**

Heritability of measured traits

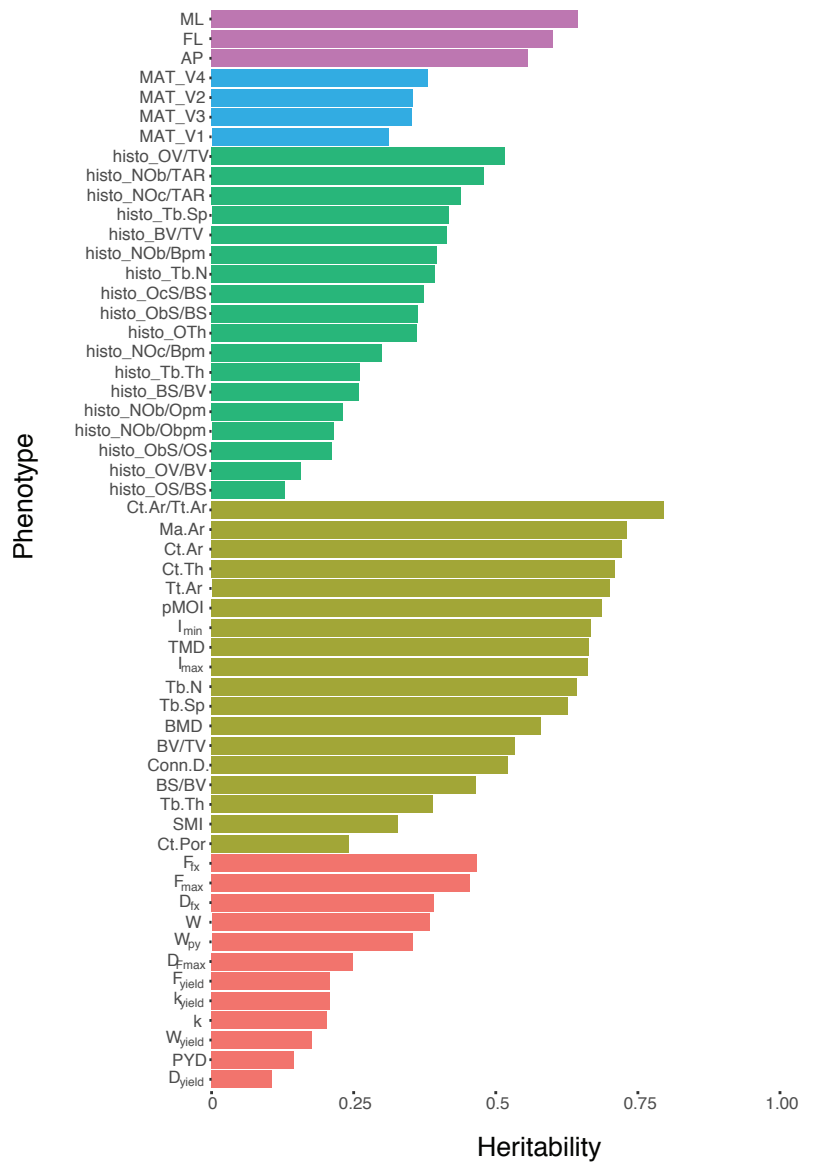

**b**

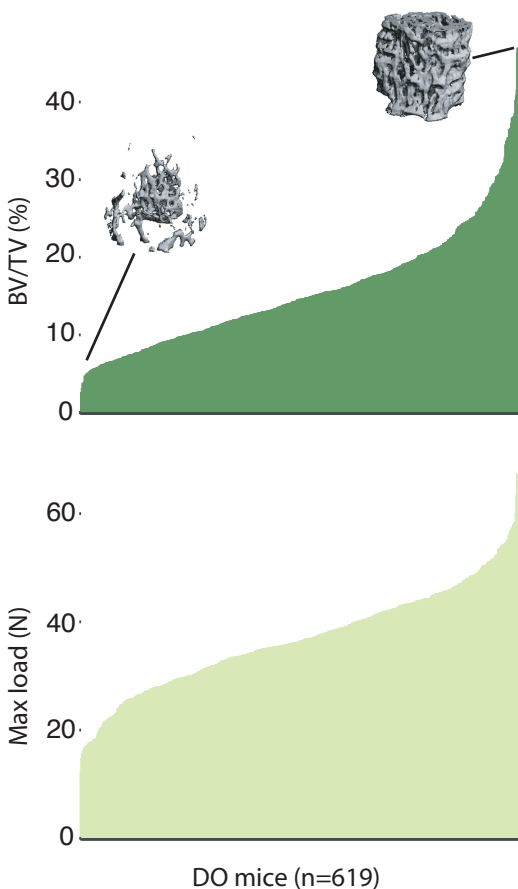

### Supplemental Figure 2: Significant QTL associations.

Twenty-eight mapped QTL exceeding permutation-based LOD score thresholds ( $\alpha=0.05$ )

## Mapped QTL

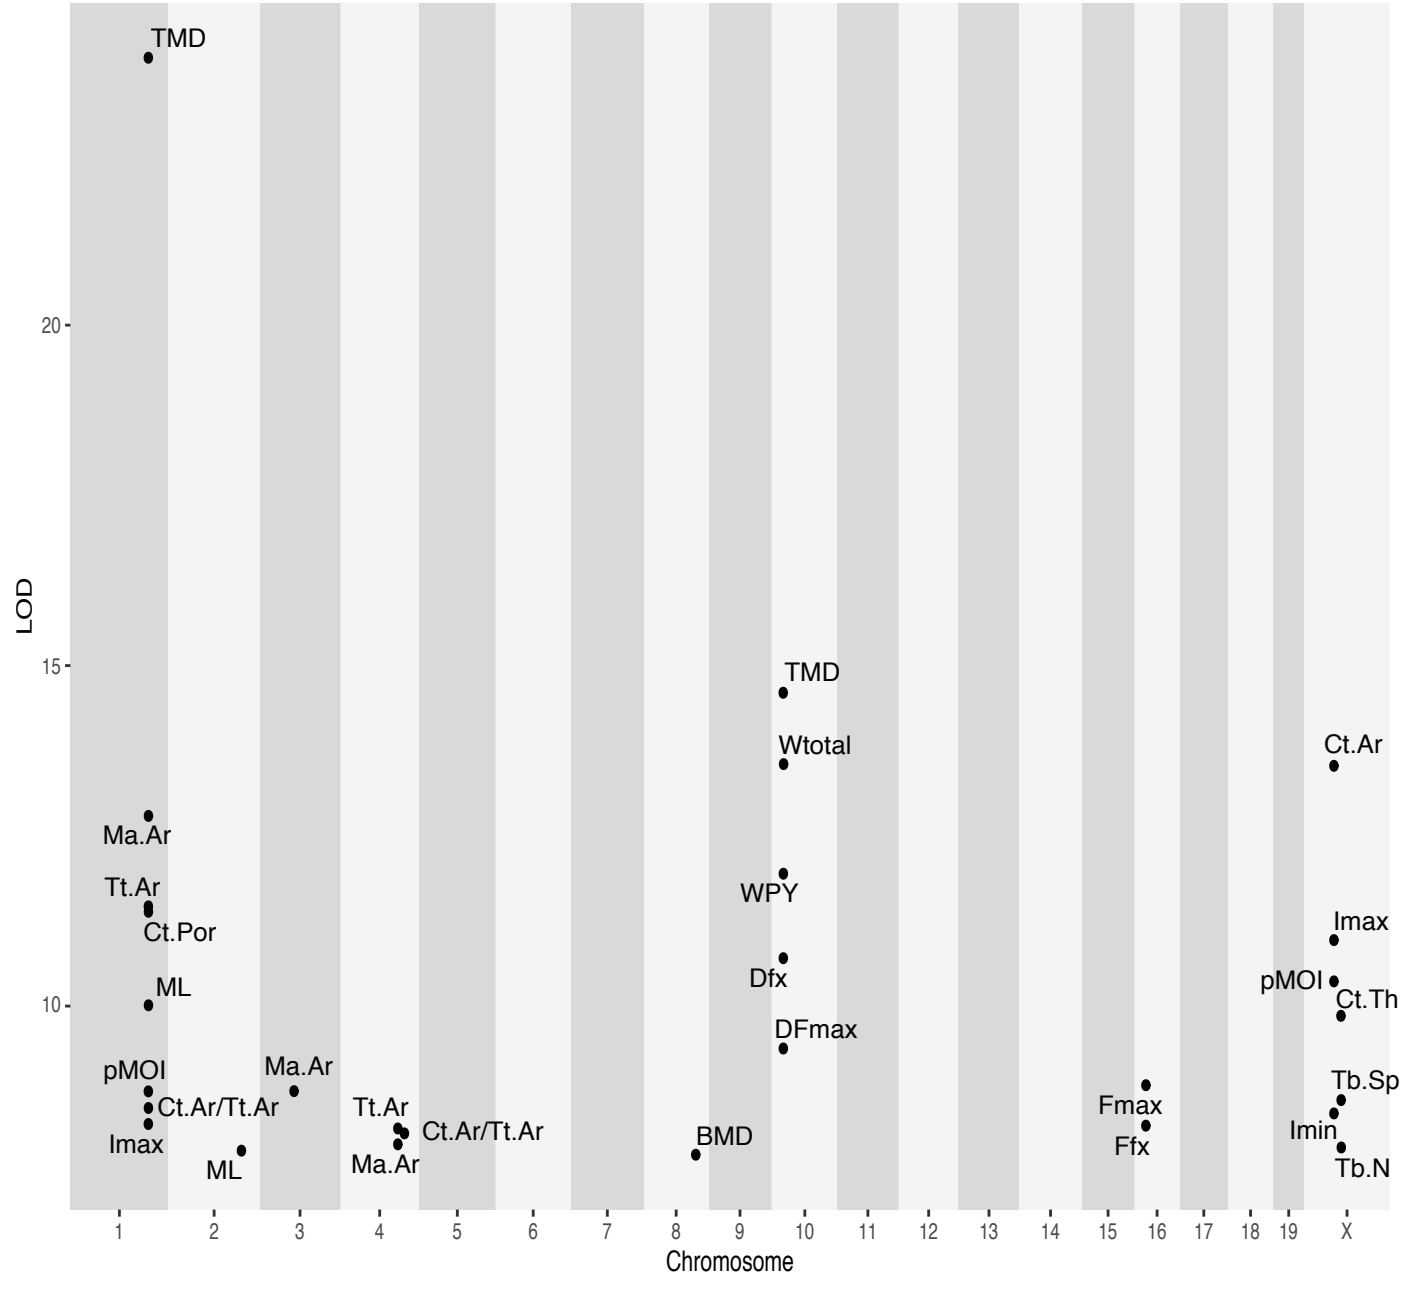

### Supplemental Figure 3. Overlap between BMD GWAS SNPs and QTL loci. Each panel corresponds to a QTL locus's syntenic human region. Red circles represent BMD GWAS SNPs in the locus.

The horizontal lines represent the genome-wide significance threshold ( $P = 5 \times 10^{-8}$ ). Not all genes are shown.

a

BMD GWAS associations in locus 1

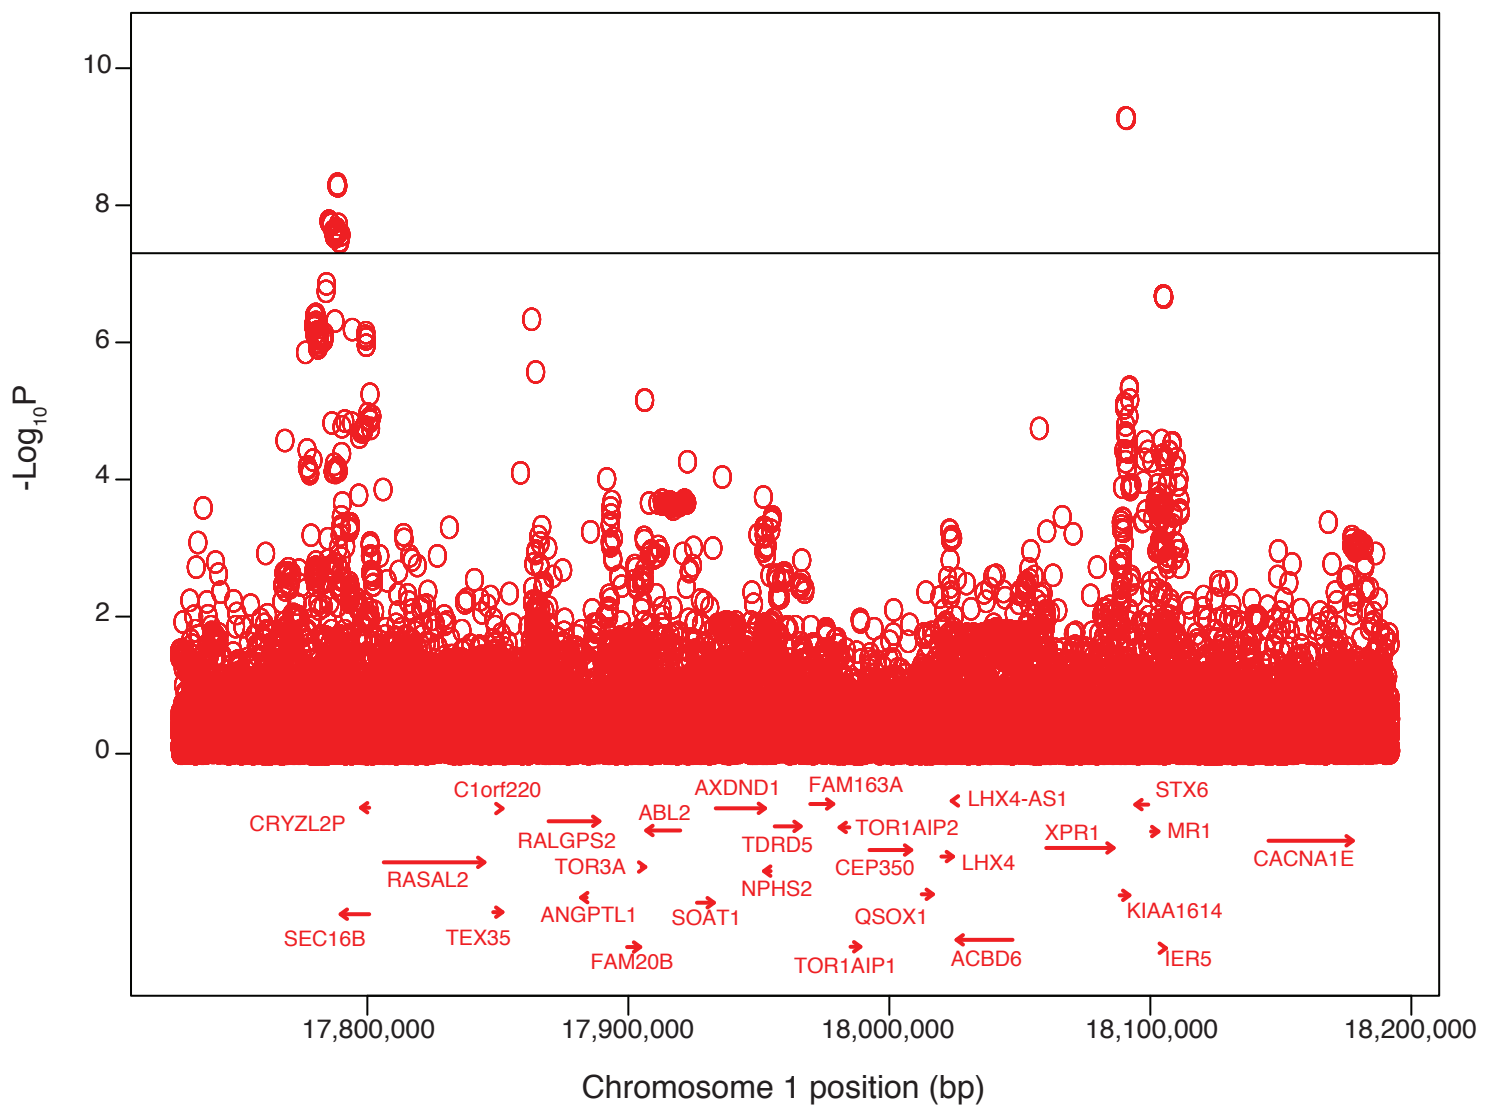

b

BMD GWAS associations in locus 2

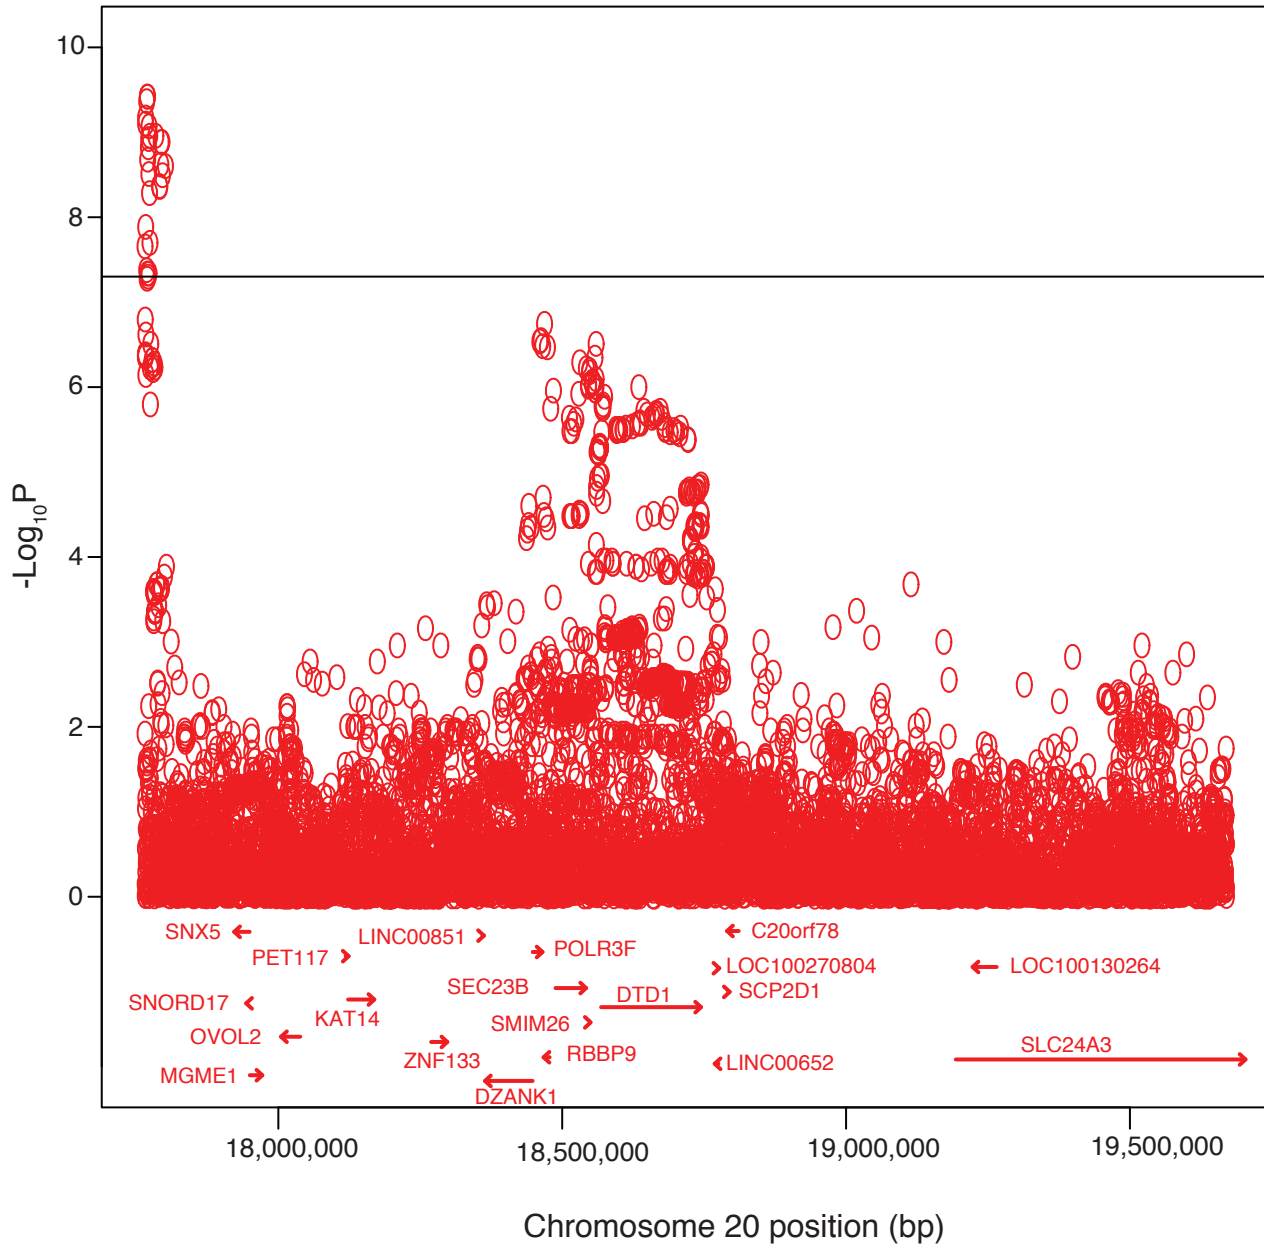



C

### BMD GWAS associations in locus 3

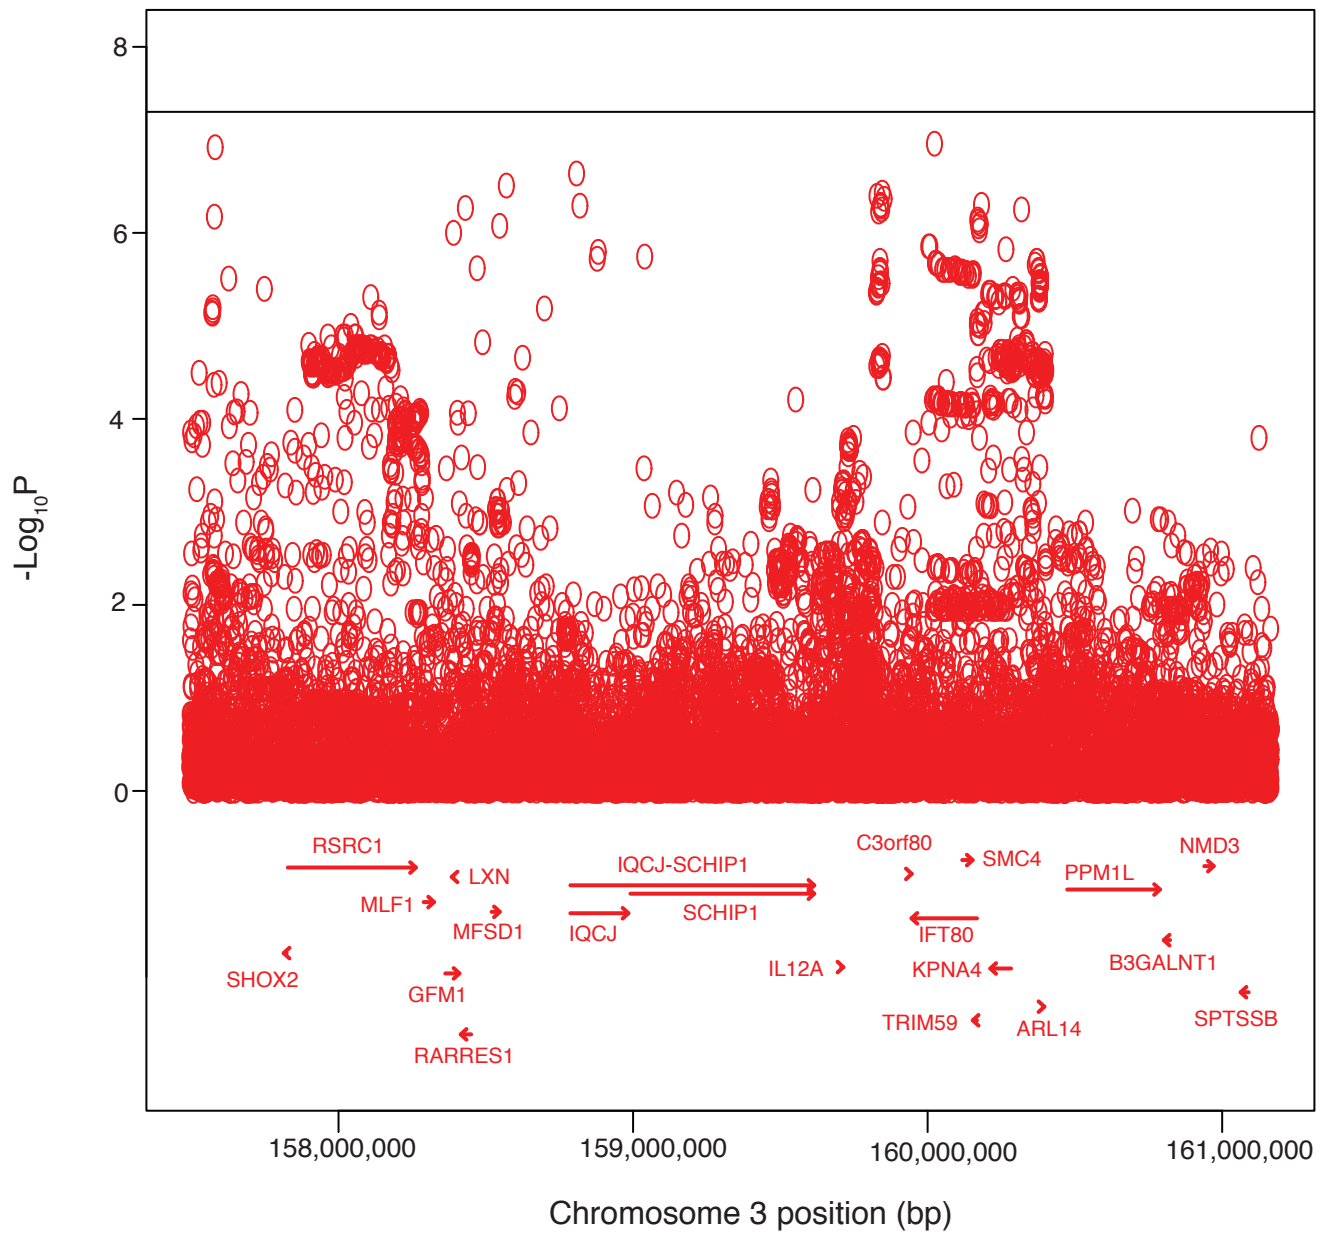

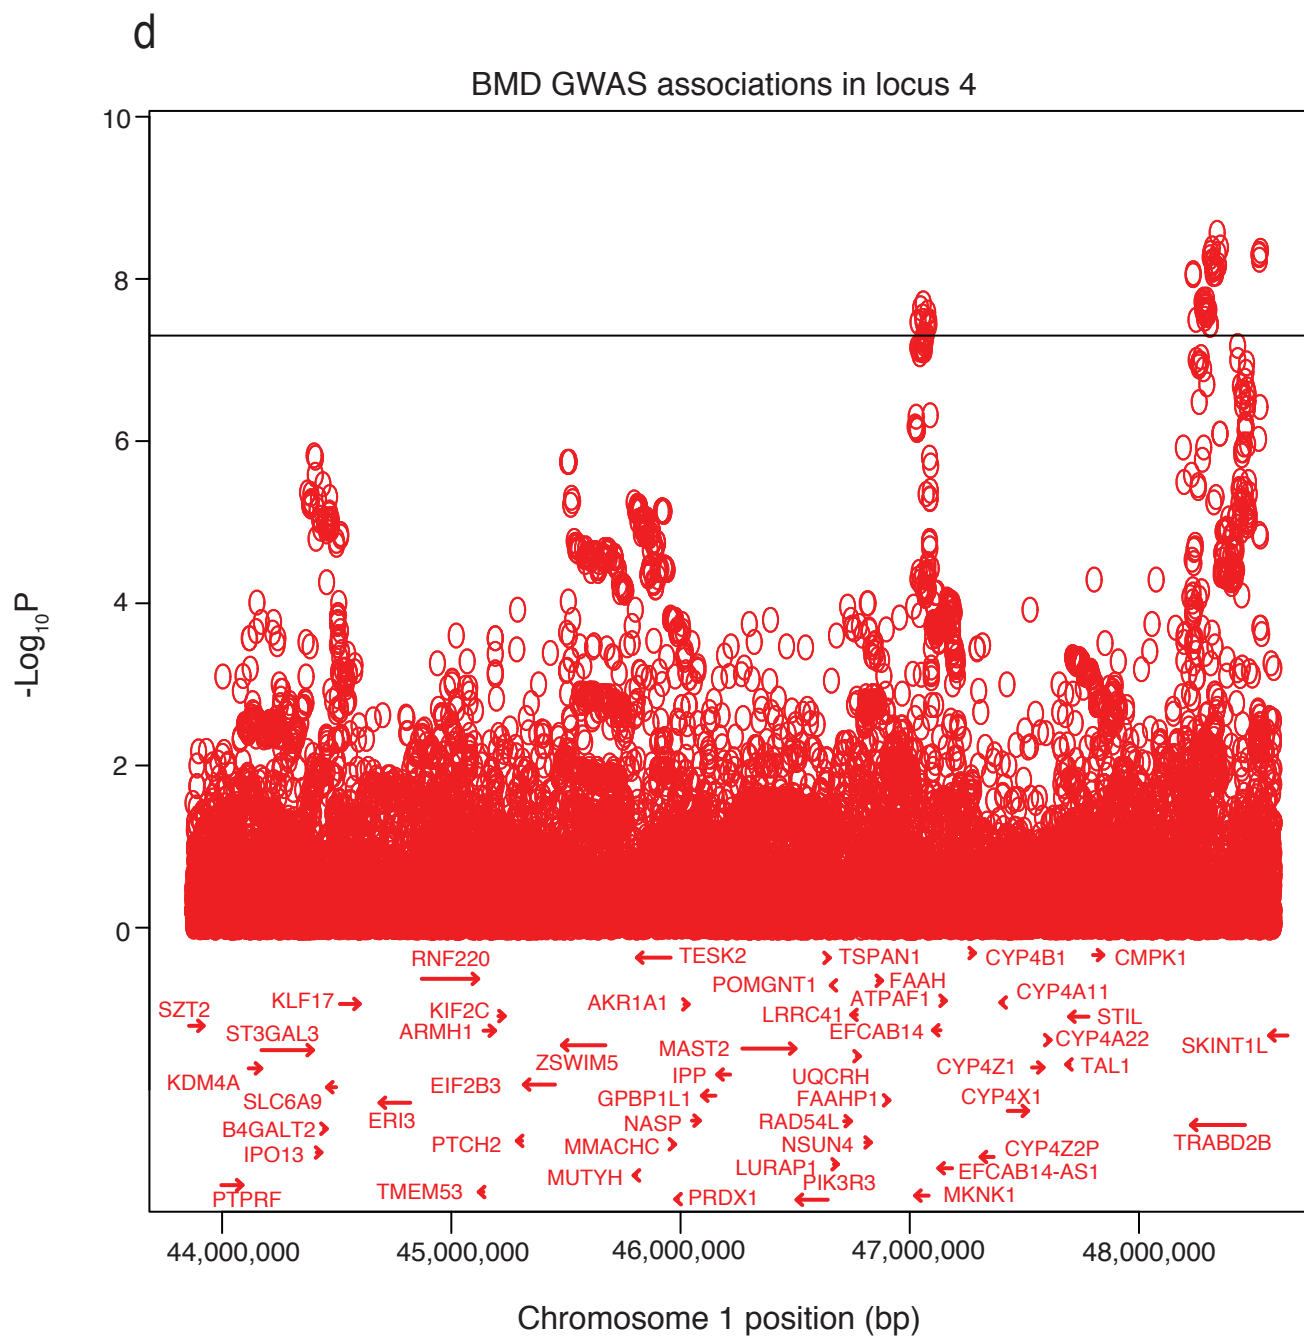

e

### BMD GWAS associations in locus 5

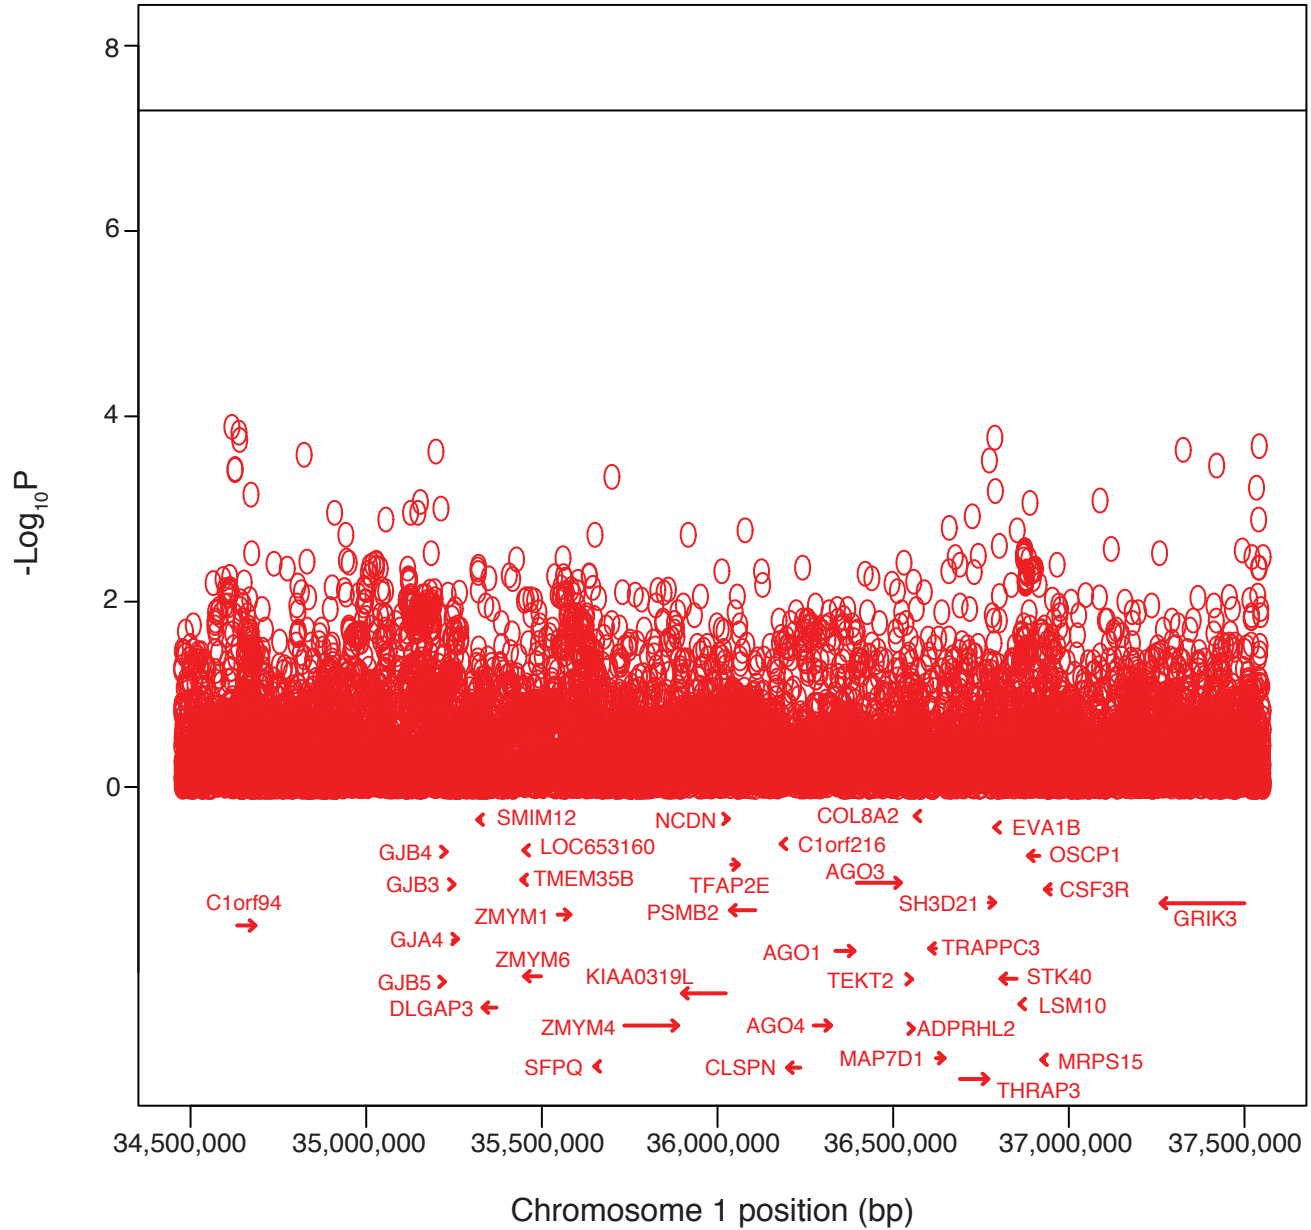

f

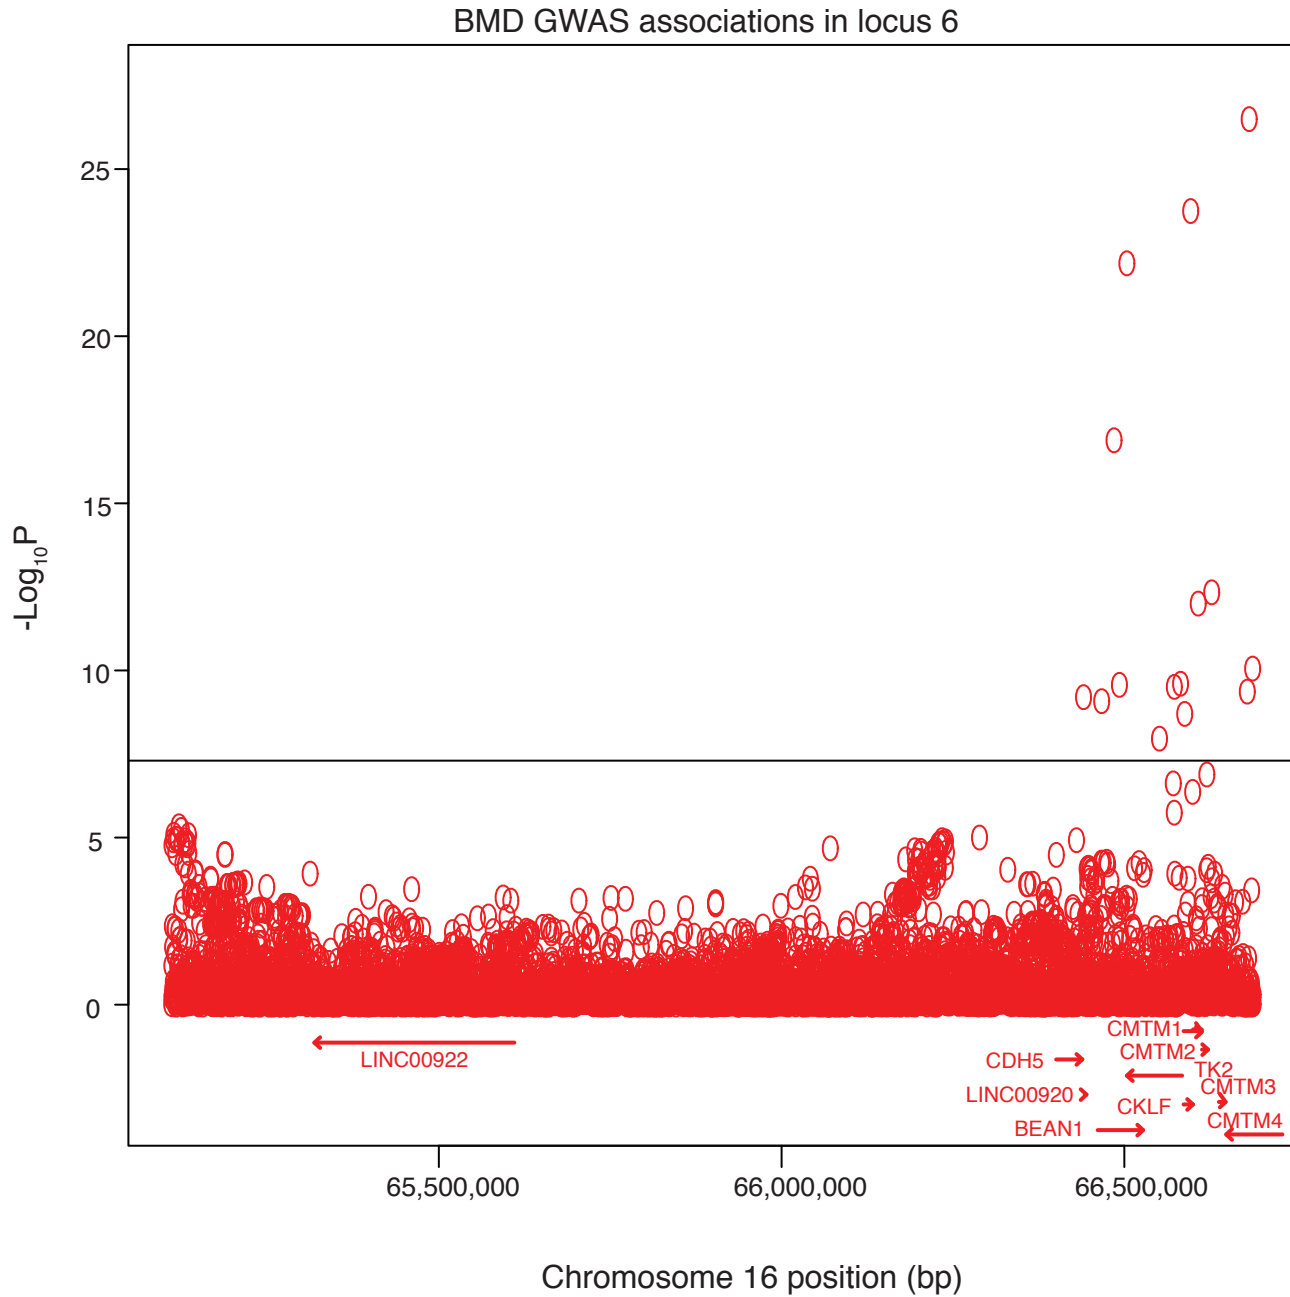

g

### BMD GWAS associations in locus 7

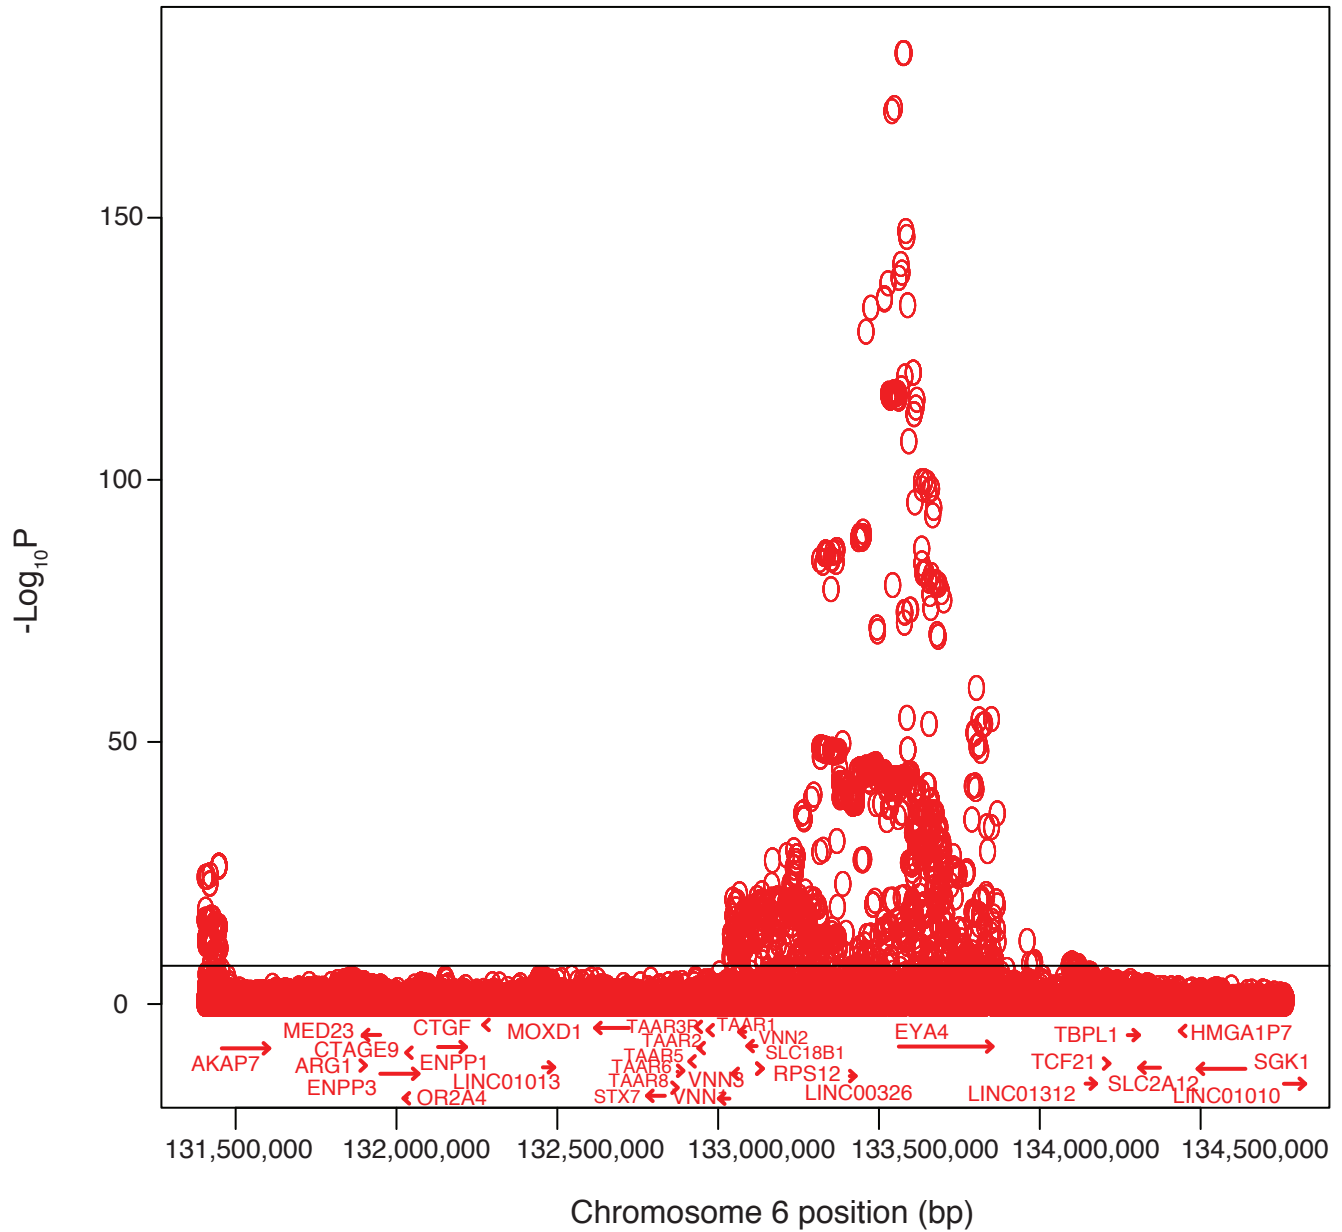

h

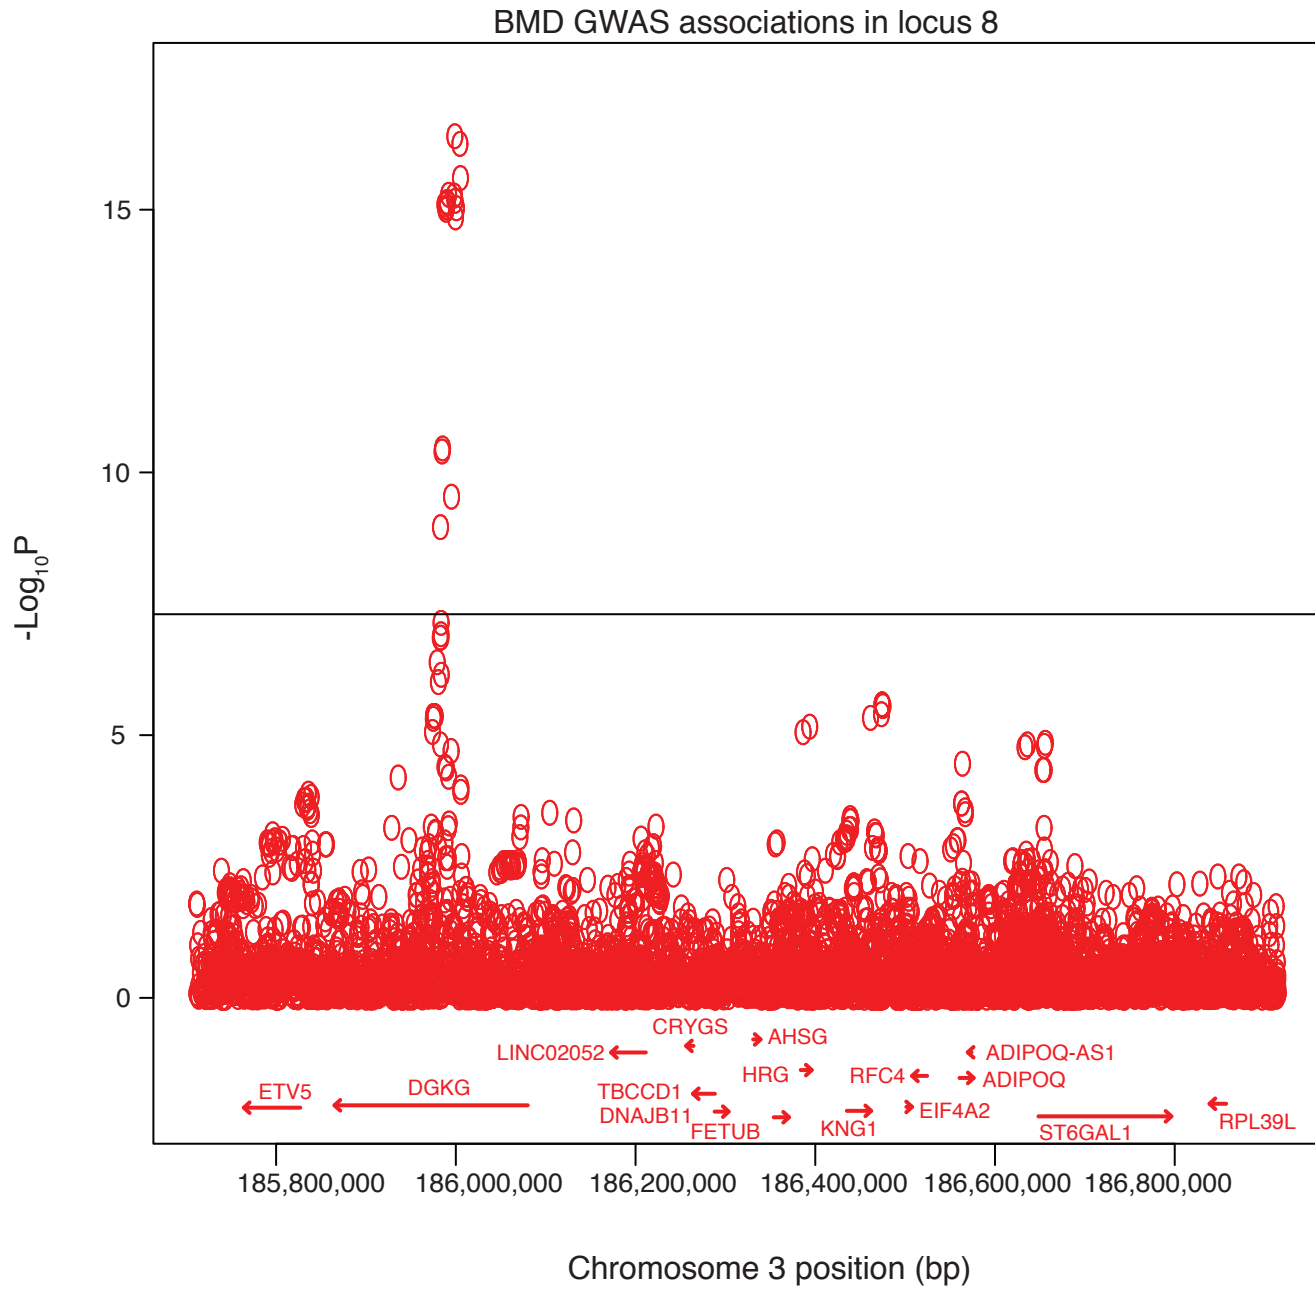

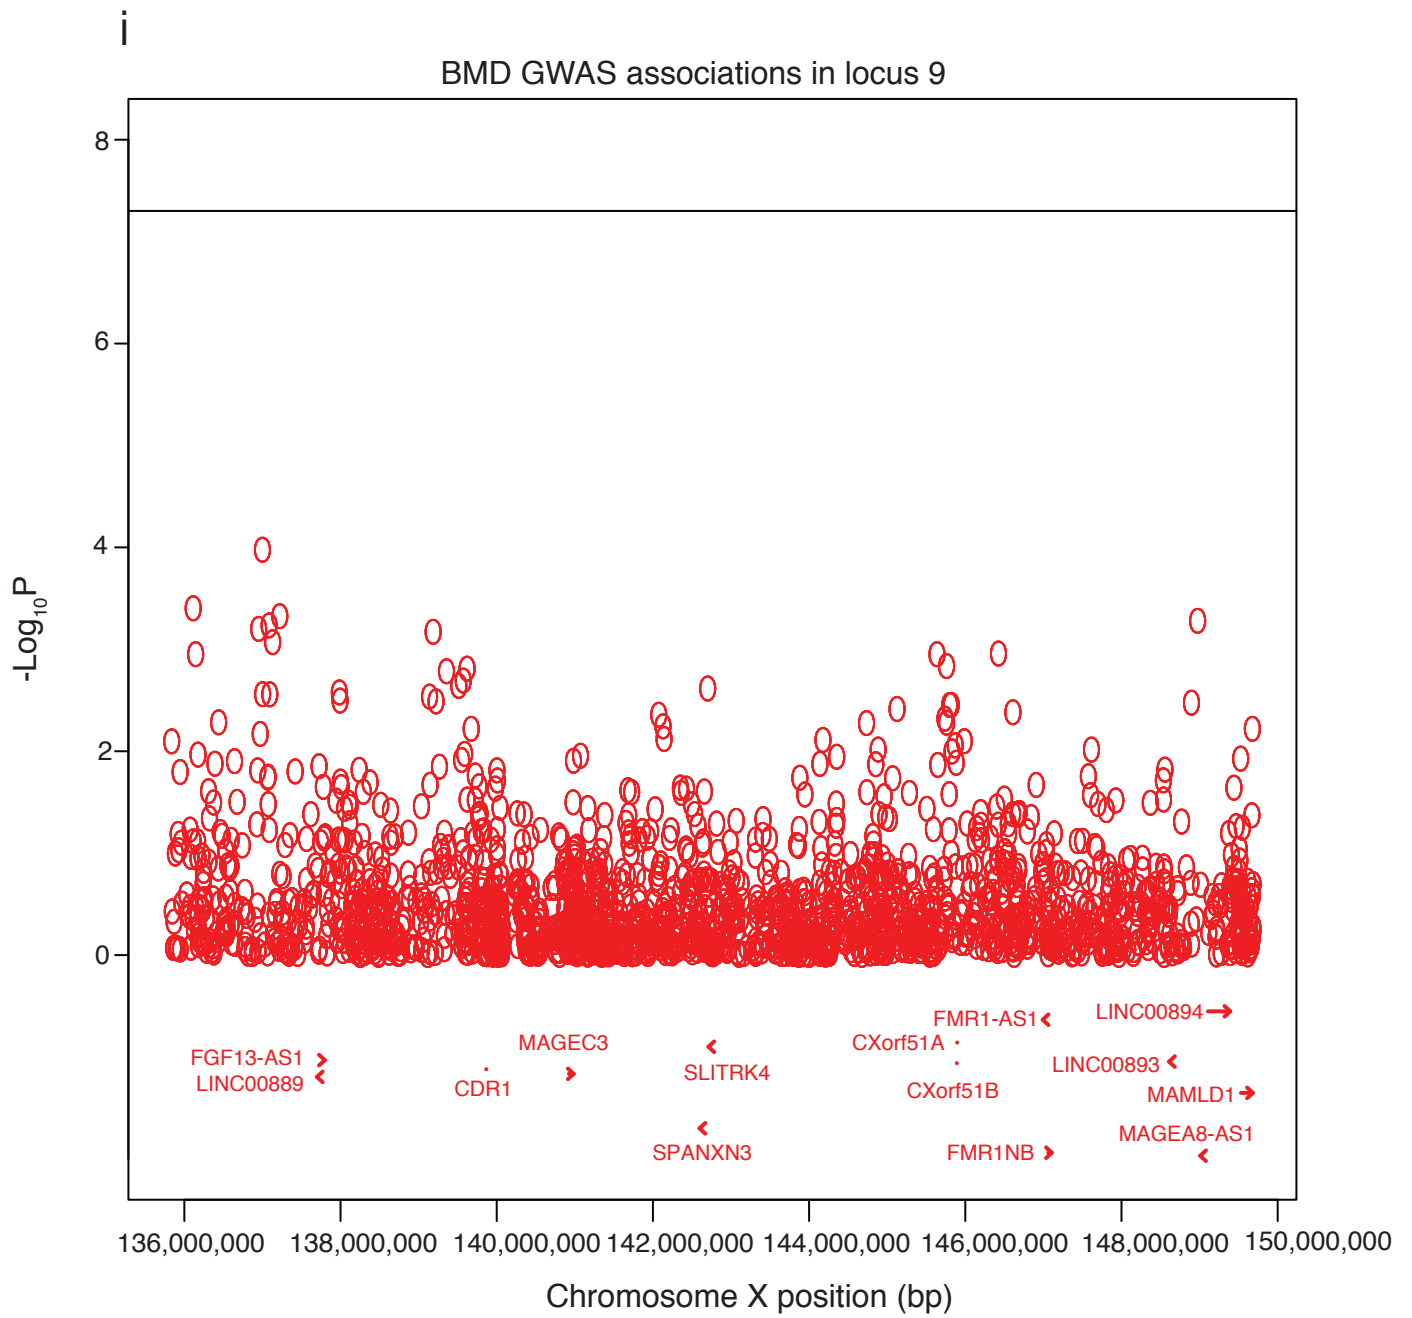

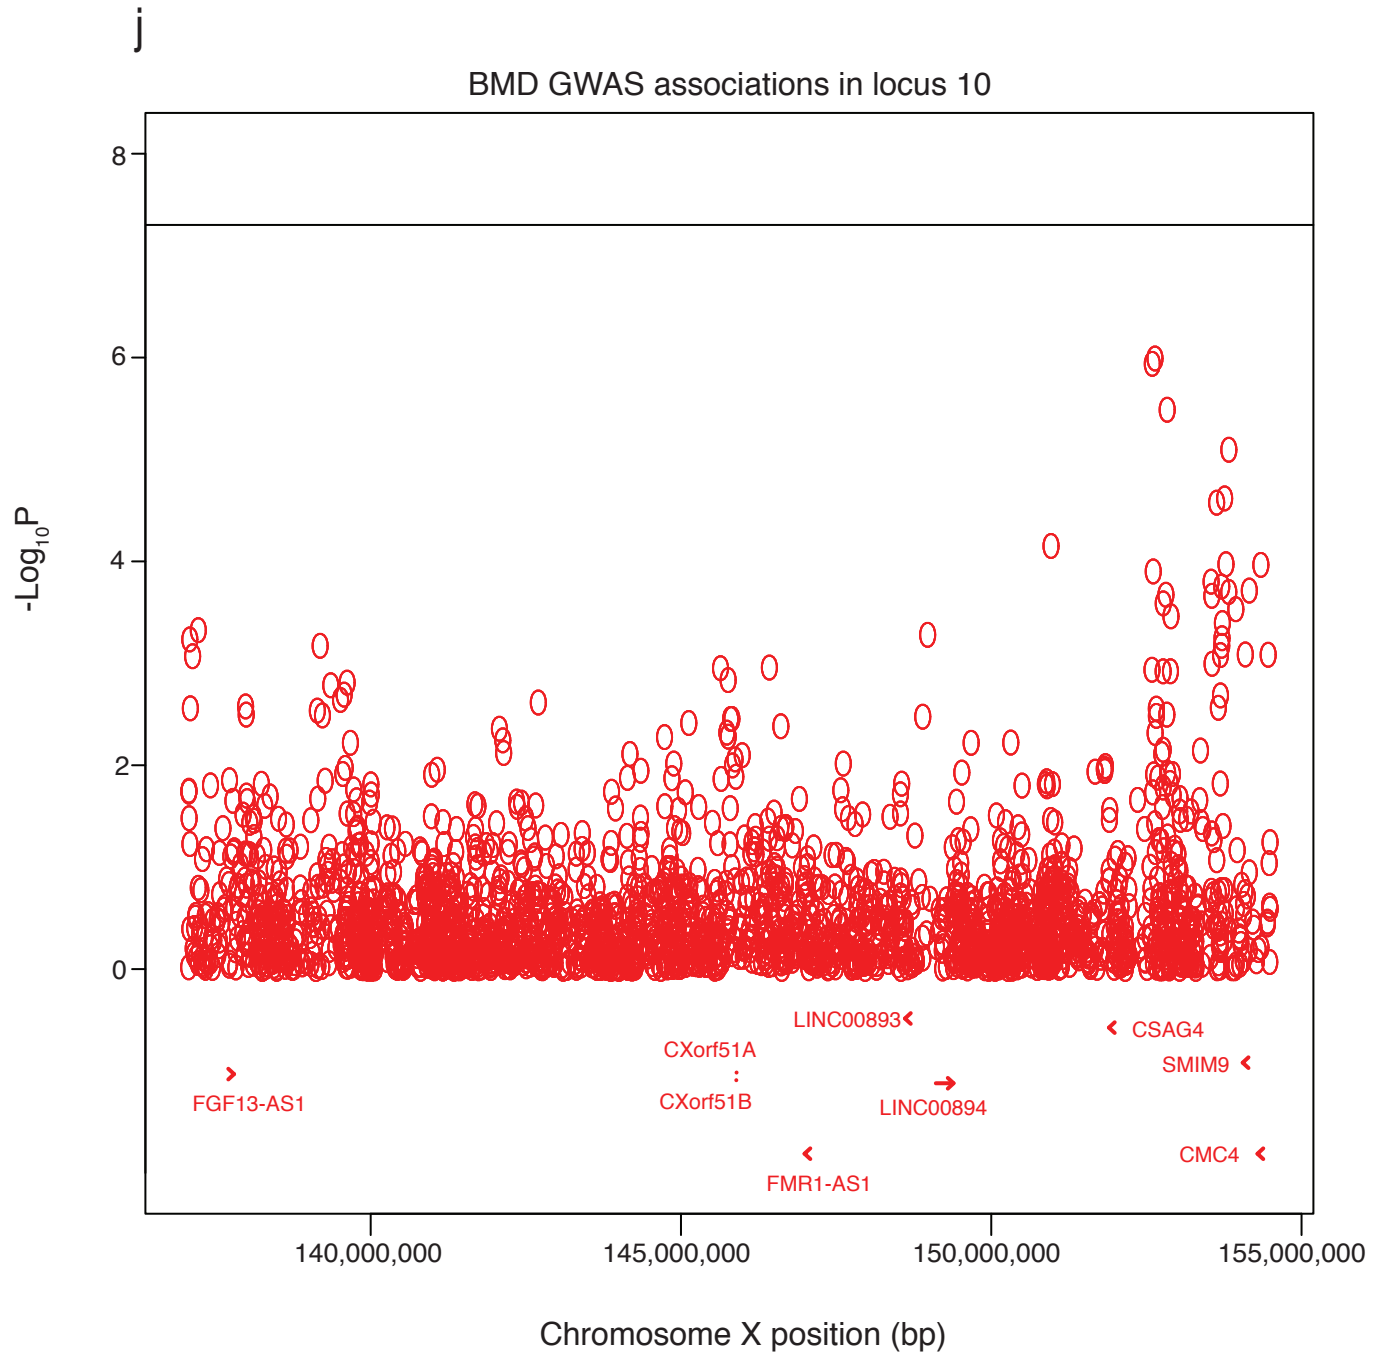



**Supplemental figure 4. ML mapping in a replication cohort.** The top panel shows allelic effects for the DO founders for ML in an interval on chromosome 1 (Mbp). Y-axis units are best linear unbiased predictors (BLUPs). The bottom panel shows the QTL scan.

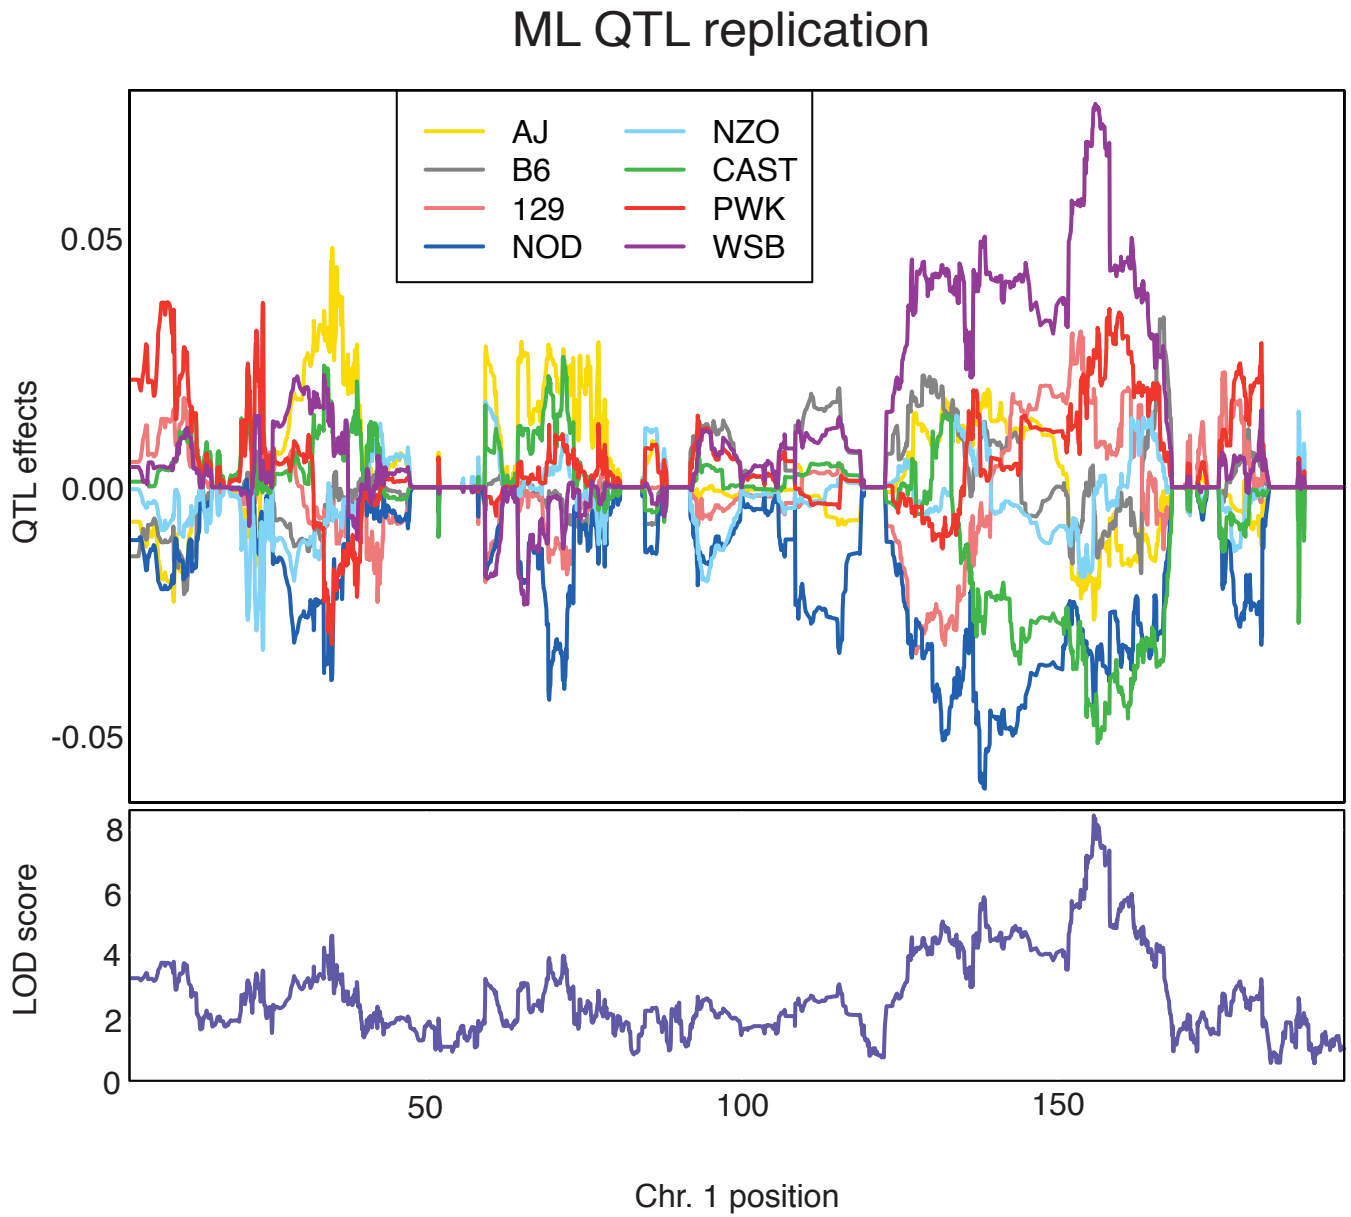

Source: https://www.biorxiv.org/content/biorxiv/early/2020/06/24/2020.06.24.169839.full.pdf
